# Supplementary material for: Indolizine synthesis via copper-catalyzed cyclization of gem-difluoroalkenes and 2-(pyridin-2-yl)acetate derivatives
Source: Royal Society of Chemistry journal article supplement (doi:10.1039/d0qo00553c), 2020-01-01

# Supporting Information

## Indolizine Synthesis via Copper-Catalyzed Cyclization of *gem*-Difluoroalkenes and 2-(Pyridin-2-yl)acetate Derivatives

Chuan-Jun Lu,<sup>\*a,b</sup> Xin Yu,<sup>b</sup> Yu-Ting Chen,<sup>b</sup> Qing-Bao Song,<sup>b</sup> Hong Wang<sup>b</sup>

*a* College of Chemistry and Chemical Engineering, Qingdao University, Ningxia Road 308#, Qingdao 266071

*b* College of Chemical Engineering, Zhejiang University of Technology, Chaowang Road 18#, Hangzhou 310014

E-mail: [luchuanjun@zjut.edu.cn](mailto:luchuanjun@zjut.edu.cn).

### Contents

|                                                                                                                             |    |
|-----------------------------------------------------------------------------------------------------------------------------|----|
| 1. Materials and methods .....                                                                                              | 2  |
| 2. General procedure for the synthesis of <i>gem</i> -difluoroalkenes .....                                                 | 2  |
| 3. Typical procedure for the copper catalyzed cyclization of 2-(pyridin-2-yl)acetate with <i>gem</i> -difluoroalkenes ..... | 2  |
| 4. Characterization of the title compounds .....                                                                            | 3  |
| 5. References .....                                                                                                         | 15 |
| 6. <sup>1</sup> H, <sup>13</sup> C NMR Spectra of the title compounds .....                                                 | 16 |

## 1. Materials and methods

Reactions and manipulations involving organometallic or moisture sensitive compounds were carried out under dry nitrogen and glassware heated under oven for two hours prior to use.  $^1\text{H}$  and  $^{13}\text{C}$  spectra were recorded on Bruker AVANCE III 500 MHz and Bruker AVANCE III 125 MHz using  $\text{CDCl}_3/\text{DMSO}$  as solvent with TMS as internal standard. Anhydrous dioxane, THF and DMF were freshly distilled over Na and stored under nitrogen. Commercial reagents were used as received without further purification unless otherwise noticed. HRMS were recorded on Agilent 6210 TOF LC/MS mass spectrometer. Column chromatography was carried out using silica gel (200-300 mesh). Compound **1** was purchased from commercial sources.

## 2. General procedure for the synthesis of *gem*-difluoroalkenes

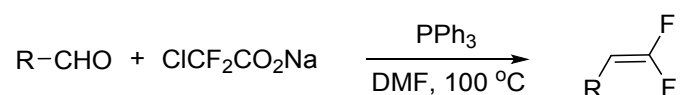

Sodium 2-chloro-2,2-difluoroacetate (1.2 equiv., 6 mmol) was added in the mixture of corresponding aldehyde (5 mmol) and triphenyl phosphine (1.5 equiv., 7.5 mmol) in dry DMF (14 mL), the reaction was heated at 100 °C for 2 hours. Then water was added to the mixture slowly and the mixture was extracted with  $\text{Et}_2\text{O}$ . The combined organic layers were dried with  $\text{Na}_2\text{SO}_4$  and concentrated under vacuum. The residue was purified by flash chromatography ( $\text{SiO}_2$ ).

## 3. Typical procedure for the copper catalyzed cyclization of 2-(pyridin-2-yl)acetate with *gem*-difluoroalkenes

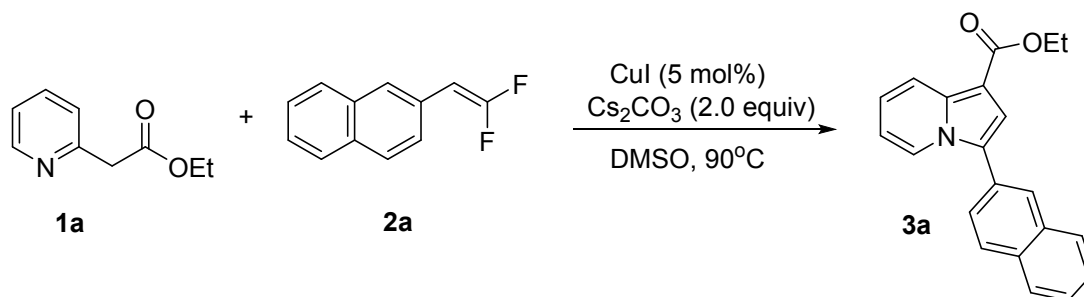

To a mixture of ethyl 2-(pyridin-2-yl)acetate **1a** (0.20 mmol, 1.0 equiv.), 2-

(2,2-difluorovinyl) naphthalene **2a** (0.3 mmol, 1.5 equiv), CuI (0.01 mmol, 5 mol%), Cs<sub>2</sub>CO<sub>3</sub> (0.4 mmol, 2 equiv.) in a sealed tube was added 1.0 mL dry DMSO. The resulting mixture was then stirred at 90 °C under argon atmosphere for 12 h. The solvent was then removed under vacuum and the residue was purified with chromatography on silica (PE/EA = 30:1) to afford compound **3a**.

#### 4. Characterization of the Title Compounds

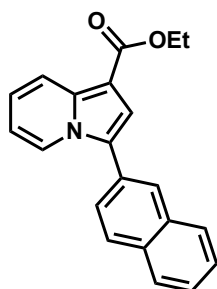

**3a**

**Ethyl 3-(naphthalen-2-yl)indolizine-1-carboxylate (3a)**, 47 mg, 75%, white solid, m. p. 65–67°C. <sup>1</sup>H NMR (500 MHz, CDCl<sub>3</sub>) δ 8.40 (dt, *J* = 7.5, 1.5 Hz, 1H), 8.32 (dt, *J* = 9.0, 1.5 Hz, 1H), 8.04-8.02 (m, 1H), 7.97(d, *J* = 8.5 Hz, 1H), 7.92-7.87(m, 2H), 7.66(dd, *J* = 8.5, 2.0 Hz, 1H), 7.58-7.52(m, 2H), 7.44 (s, 1H), 7.137-7.096(m, 1H), 6.74(td, *J* = 6.5, 1.5 Hz, 1H), 4.44(q, *J* = 7.5 Hz, 2H), 1.46(t, *J* = 7.5 Hz, 3H). Characterization data is consistent with literature<sup>2</sup>.

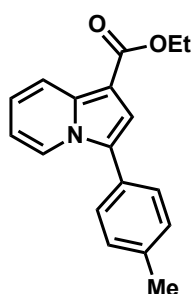

**3b**

**Ethyl 3-(p-tolyl)indolizine-1-carboxylate (3b)**, 45 mg, 81%, white solid, m. p. 93-95 °C. <sup>1</sup>H NMR (500 MHz, CDCl<sub>3</sub>) δ 8.29-8.25 (m, 2H), 7.44 (d, *J* = 8.0 Hz, 2H), 7.34-7.28 (m, 3H), 7.09-7.05 (m, 1H), 6.71-6.68 (m, 1H), 4.41 (q, *J* = 7.0 Hz, 2H), 2.44 (s, 3H), 1.44 (t, *J* = 7.0 Hz, 3H). <sup>13</sup>C NMR (126 MHz, CDCl<sub>3</sub>) δ 165.07, 137.94, 136.21, 129.75, 128.58, 128.32, 126.49, 123.39, 122.03, 120.14, 115.80, 112.43, 104.13, 59.50,

21.30, 14.67. Characterization data is consistent with literature<sup>2</sup>.

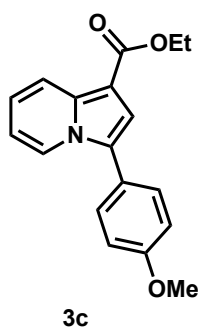

**Ethyl 3-(4-methoxyphenyl)indolizine-1-carboxylate (3c)**, 49 mg, 83%, white solid, m. p. 124-126 °C. <sup>1</sup>H NMR (500 MHz, CDCl<sub>3</sub>) δ 8.26 (dt, *J* = 9.0, 1.5 Hz, 1H), 8.21 (dt, *J* = 7.0, 1.0 Hz, 1H), 7.48-7.44 (m, 2H), 7.27 (d, *J* = 10.5 Hz, 1H), 7.08-7.02 (m, 3H), 6.69 (td, *J* = 6.5, 1.5 Hz, 1H), 4.40 (q, *J* = 7.0 Hz, 2H), 3.89 (s, 3H), 1.43 (t, *J* = 7.5 Hz, 3H). <sup>13</sup>C NMR (125 MHz, CDCl<sub>3</sub>) δ 165.09, 159.48, 136.04, 130.16, 126.24, 123.59, 123.32, 121.94, 120.11, 115.61, 114.53, 112.41, 103.99, 59.50, 55.39, 14.68.

Characterization data is consistent with literature<sup>2</sup>.

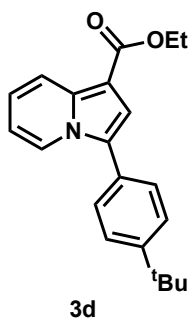

**Ethyl 3-(4-(tert-butyl)phenyl)indolizine-1-carboxylate (3d)**, 50 mg, 79%, white solid, m. p. 133-135 °C. <sup>1</sup>H NMR (500 MHz, CDCl<sub>3</sub>) δ 8.32 (dt, *J* = 7.0, 1.0 Hz, 1H), 8.27 (dt, *J* = 9.0, 1.0 Hz, 1H), 7.56-7.47 (m, 4H), 7.30 (s, 1H), 7.09-7.05 (m, 1H), 6.70 (td, *J* = 7.0, 1.5 Hz, 1H), 4.41 (q, *J* = 7.0 Hz, 2H), 1.44 (t, *J* = 7.0 Hz, 3H), 1.40 (s, 9H). <sup>13</sup>C NMR (125 MHz, CDCl<sub>3</sub>) δ 165.09, 151.13, 136.24, 128.36, 128.33, 126.50, 125.99, 123.51, 122.06, 120.15, 115.87, 112.41, 104.17, 59.51, 34.75, 31.32, 14.68.

Characterization data is consistent with literature<sup>2</sup>.

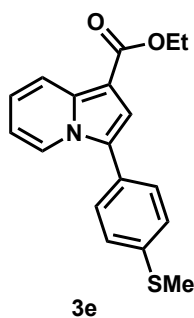

**Ethyl 3-(4-(methylthio)phenyl)indolizine-1-carboxylate (3e)**, 48 mg, 78%, white solid, m. p. 107-109 °C. <sup>1</sup>H NMR (500 MHz, CDCl<sub>3</sub>) δ 8.28-8.21 (m, 2H), 7.46-7.42 (m, 2H), 7.37-7.34 (m, 2H), 7.29 (s, 1H), 7.08-7.03 (m, 1H), 6.69 (tt, *J* = 7.0, 1.5 Hz, 1H), 4.40 (q, *J* = 7.0 Hz, 2H), 2.53 (s, 3H), 1.43 (t, *J* = 7.0 Hz, 3H). <sup>13</sup>C NMR (125 MHz, CDCl<sub>3</sub>) δ 164.87, 138.57, 136.24, 128.83, 127.72, 126.80, 125.82, 123.20, 122.10, 120.10, 115.90, 112.54, 104.22, 59.47, 15.58, 14.61. HRMS (ESI) *m/z* calculated for [C<sub>18</sub>H<sub>17</sub>NO<sub>2</sub>S+H]<sup>+</sup> 312.1053, found 312.1046.

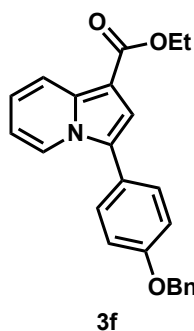

**Ethyl 3-(4-(benzyloxy)phenyl)indolizine-1-carboxylate (3f)**, 64 mg, 87%, colorless oil. <sup>1</sup>H NMR (500 MHz, CDCl<sub>3</sub>) δ 8.29 (dt, *J* = 9.0, 1.5 Hz, 1H), 8.23 (dt, *J* = 7.0, 1.0 Hz, 1H), 7.49-7.46 (m, 2H), 7.44-7.40 (m, 3H), 7.39-7.33 (m, 2H), 7.17-7.15 (m, 2H), 7.10-7.02 (m, 2H), 6.67 (td, *J* = 7.0, 1.5 Hz, 1H), 5.15 (s, 2H), 4.43 (q, *J* = 7.0 Hz, 2H), 1.46 (t, *J* = 7.0 Hz, 3H). <sup>13</sup>C NMR (125 MHz, CDCl<sub>3</sub>) δ 164.93, 159.09, 136.71, 136.36, 132.44, 130.12, 128.60, 127.97, 127.38, 126.14, 123.42, 122.18, 121.06, 120.08, 116.10, 114.83, 114.59, 112.54, 104.21, 70.01, 59.50, 14.62. HRMS (ESI) *m/z* calculated for [C<sub>24</sub>H<sub>21</sub>NO<sub>3</sub>+H]<sup>+</sup> 372.1594, found 372.1588.

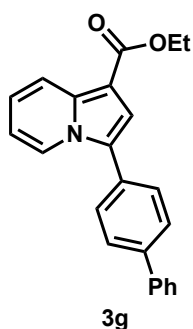

**Ethyl 3-([1,1'-biphenyl]-4-yl)indolizine-1-carboxylate (3g)**, 52 mg, 77%, white solid, m. p. 150-152 °C. <sup>1</sup>H NMR (500 MHz, CDCl<sub>3</sub>) δ 8.37 (dt, *J* = 7.0, 1.0 Hz, 1H), 8.31 (dt, *J* = 9.0, 1.0 Hz, 1H), 7.77-7.72 (m, 2H), 7.70-7.66 (m, 2H), 7.66-7.62 (m, 2H), 7.52-7.48 (m, 2H), 7.43 – 7.37 (m, 2H), 7.12-7.08 (m, 1H), 6.74 (td, *J* = 7.0, 1.5 Hz, 1H), 4.44 (q, *J* = 7.0 Hz, 2H), 1.46 (t, *J* = 7.0 Hz, 3H). <sup>13</sup>C NMR (126 MHz, CDCl<sub>3</sub>) δ 164.98, 140.68, 140.35, 136.45, 130.13, 128.87, 128.81, 127.69, 127.55, 126.98, 126.04, 123.39, 122.23, 120.19, 116.19, 112.63, 104.40, 59.55, 14.65. Characterization data is consistent with literature<sup>3</sup>.

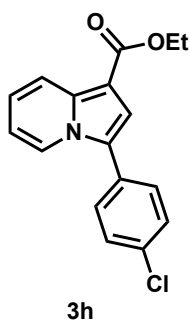

**Ethyl 3-(4-chlorophenyl)indolizine-1-carboxylate (3h)**, 40 mg, 68%, yellow solid, m. p. 107-109 °C. <sup>1</sup>H NMR (500 MHz, CDCl<sub>3</sub>) δ 8.28 (dt, *J* = 9.0, 1.0 Hz, 1H), 8.24 (dt, *J* = 7.0, 1.0 Hz, 1H), 7.51-7.44 (m, 4H), 7.31 (s, 1H), 7.11-7.07 (m, 1H), 6.73 (td, *J* = 7.0, 1.5 Hz, 1H), 4.40 (q, *J* = 7.0 Hz, 2H), 1.43 (t, *J* = 7.0 Hz, 3H). <sup>13</sup>C NMR (125 MHz, CDCl<sub>3</sub>) δ 164.89, 136.49, 133.85, 129.80, 129.74, 129.36, 125.09, 123.11, 122.38, 120.30, 116.38, 112.84, 104.51, 59.63, 14.66. Characterization data is consistent with literature<sup>2</sup>.

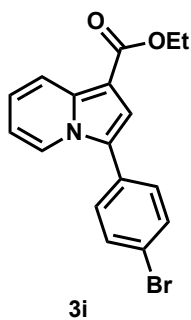

**Ethyl 3-(4-bromophenyl)indolizine-1-carboxylate (3i)**, 48 mg, 71%, white solid, m. p. 93-95 °C. <sup>1</sup>H NMR (500 MHz, CDCl<sub>3</sub>) δ 8.28 (dt, *J* = 9.0, 1.0 Hz, 1H), 8.24 (dt, *J* = 7.0, 1.0 Hz, 1H), 7.66-7.60 (m, 2H), 7.44-7.40 (m, 2H), 7.31 (s, 1H), 7.11-7.07 (m, 1H), 6.73 (td, *J* = 7.0, 1.5 Hz, 1H), 4.40 (q, *J* = 7.0 Hz, 2H), 1.43 (t, *J* = 7.0 Hz, 3H). <sup>13</sup>C NMR (125 MHz, CDCl<sub>3</sub>) δ 164.86, 136.50, 132.29, 130.18, 130.02, 125.07, 123.08, 122.39, 121.90, 120.29, 116.37, 112.86, 104.54, 59.62, 14.65. Characterization data is consistent with literature<sup>2</sup>.

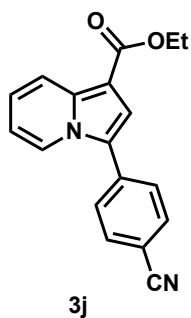

**Ethyl 3-(4-cyanophenyl)indolizine-1-carboxylate (3j)**, 30 mg, 52%, white solid, m. p. 170-172 °C. <sup>1</sup>H NMR (500 MHz, CDCl<sub>3</sub>) δ 8.34 (dt, *J* = 7.0, 1.0 Hz, 1H), 8.30 (dt, *J* = 9.0, 1.5 Hz, 1H), 7.80-7.75 (m, 2H), 7.71-7.66 (m, 2H), 7.41 (s, 1H), 7.17-7.12 (m, 1H), 6.80 (td, *J* = 6.9, 1.4 Hz, 1H), 4.40 (q, *J* = 7.0 Hz, 2H), 1.43 (t, *J* = 7.0 Hz, 3H). <sup>13</sup>C NMR (125 MHz, CDCl<sub>3</sub>) δ 164.59, 137.19, 135.85, 132.90, 128.24, 124.27, 123.09, 123.00, 120.50, 118.61, 117.69, 113.41, 110.95, 105.33, 59.77, 14.60. Characterization data is consistent with literature<sup>2</sup>.

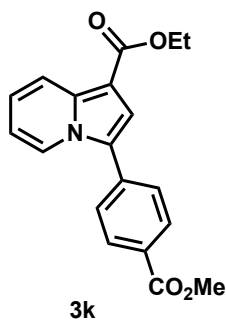

**Ethyl 3-(4-(methoxycarbonyl)phenyl)indolizine-1-carboxylate (3k)**, 36 mg, 57%, pale yellow solid, m. p. 152-154 °C. <sup>1</sup>H NMR (500 MHz, CDCl<sub>3</sub>) δ 8.36 (dd, *J* = 7.0, 1.0 Hz, 1H), 8.29 (dt, *J* = 9.0, 1.5 Hz, 1H), 8.16 (d, *J* = 8.5 Hz, 2H), 7.67-7.62 (m, 2H), 7.40 (s, 1H), 7.14-7.09 (m, 1H), 6.76 (td, *J* = 7.0, 1.5 Hz, 1H), 4.40 (q, *J* = 7.0 Hz, 2H), 3.96 (s, 3H), 1.43 (t, *J* = 7.0 Hz, 3H). <sup>13</sup>C NMR (125 MHz, CDCl<sub>3</sub>) δ 166.60, 164.77, 136.94, 135.76, 130.38, 129.14, 127.80, 125.26, 123.27, 122.72, 120.36, 117.14, 113.06, 104.94, 59.66, 52.21, 14.63. Characterization data is consistent with literature<sup>3</sup>.

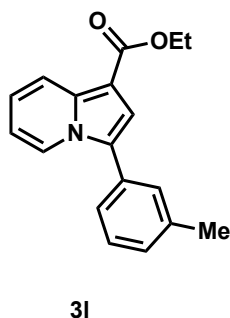

**Ethyl 3-(m-tolyl)indolizine-1-carboxylate (3l)**, 45 mg, 81%, colorless oil. <sup>1</sup>H NMR (500 MHz, CDCl<sub>3</sub>) δ 8.31 (dt, *J* = 7.0, 1.0 Hz, 1H), 8.27 (dt, *J* = 9.0, 1.5 Hz, 1H), 7.42-7.34 (m, 3H), 7.31 (s, 1H), 7.25-7.21 (m, 1H), 7.10-7.06 (m, 1H), 6.71 (td, *J* = 7.0, 1.5 Hz, 1H), 4.41 (q, *J* = 7.0 Hz, 2H), 2.44 (s, 3H), 1.44 (t, *J* = 7.0 Hz, 3H). <sup>13</sup>C NMR (125 MHz, CDCl<sub>3</sub>) δ 165.07, 138.84, 136.31, 131.19, 129.34, 128.93, 128.79, 126.59, 125.61, 123.47, 122.13, 120.15, 116.00, 112.49, 104.19, 59.53, 21.48, 14.67. Characterization data is consistent with literature<sup>2</sup>.



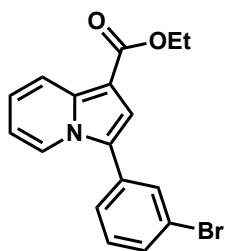

**3m**

**Ethyl 3-(3-bromophenyl)indolizine-1-carboxylate (3m)**, 52 mg, 75%, white solid, m. p. 105-107 °C. <sup>1</sup>H NMR (500 MHz, CDCl<sub>3</sub>) δ 8.30-8.24 (m, 2H), 7.70 (t, *J* = 1.5 Hz, 1H), 7.54-7.50 (m, 1H), 7.48 (dt, *J* = 8.0, 1.5 Hz, 1H), 7.38-7.31 (m, 2H), 7.12-7.07 (m, 1H), 6.74 (td, *J* = 7.0, 1.5 Hz, 1H), 4.40 (q, *J* = 7.0 Hz, 2H), 1.43 (t, *J* = 7.0 Hz, 3H). <sup>13</sup>C NMR (125 MHz, CDCl<sub>3</sub>) δ 164.77, 136.56, 133.29, 131.26, 130.86, 130.53, 126.91, 124.64, 123.09, 122.49, 120.25, 116.67, 112.91, 104.58, 59.59, 14.63. Characterization data is consistent with literature<sup>2</sup>.

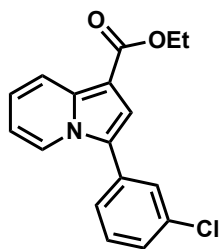

**3n**

**Ethyl 3-(3-chlorophenyl)indolizine-1-carboxylate (3n)**, 36 mg, 63%, white solid, m. p. 96-98 °C. <sup>1</sup>H NMR (500 MHz, CDCl<sub>3</sub>) δ 8.31-8.27 (m, 2H), 7.56-7.54 (m, 1H), 7.46-7.41 (m, 2H), 7.40-7.36 (m, 1H), 7.33 (s, 1H), 7.12-7.08 (m, 1H), 6.75 (td, *J* = 7.0, 1.5 Hz, 1H), 4.40 (q, *J* = 7.0 Hz, 2H), 1.43 (t, *J* = 7.0 Hz, 3H). <sup>13</sup>C NMR (125 MHz, CDCl<sub>3</sub>) δ 164.84, 136.59, 135.01, 133.06, 130.34, 128.41, 127.99, 126.51, 124.82, 123.15, 122.51, 120.29, 116.66, 112.93, 104.60, 59.63, 14.65. Characterization data is consistent with literature<sup>2</sup>.

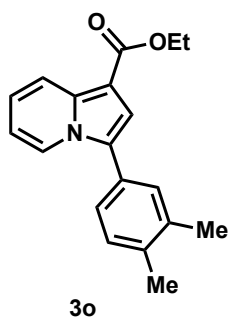

**Ethyl 3-(3,4-dimethylphenyl)indolizine-1-carboxylate (3o)**, 48 mg, 83%, white solid, m. p. 94-96 °C. <sup>1</sup>H NMR (500 MHz, CDCl<sub>3</sub>) δ 8.31- 8.25 (m, 2H), 7.34-7.24 (m, 4H), 7.08-7.04 (m, 1H), 6.69 (td, *J* = 7.0, 1.5 Hz, 1H), 4.42 (q, *J* = 7.0 Hz, 2H), 2.35 (s, 6H), 1.45 (t, *J* = 7.5 Hz, 3H). <sup>13</sup>C NMR (125 MHz, CDCl<sub>3</sub>) δ 165.01, 137.29, 136.55, 136.11, 130.17, 129.80, 128.64, 126.58, 125.92, 123.41, 121.90, 120.02, 115.64, 112.31, 104.00, 59.40, 19.75, 19.51, 14.62. Characterization data is consistent with literature<sup>2</sup>.

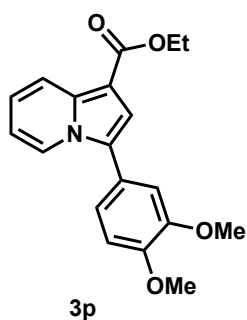

**Ethyl 3-(3,4-dimethoxyphenyl)indolizine-1-carboxylate (3p)**, 52 mg, 82%, white solid, m. p. 78-80 °C. <sup>1</sup>H NMR (500 MHz, CDCl<sub>3</sub>) δ 8.27-8.21 (m, 2H), 7.26 (s, 1H), 7.08 (dd, *J* = 8.5, 2.0 Hz, 1H), 7.07-7.02 (m, 1H), 7.01 (d, *J* = 2.0 Hz, 1H), 6.98 (d, *J* = 8.0 Hz, 1H), 6.68 (td, *J* = 7.0, 1.0 Hz, 1H), 4.39 (q, *J* = 7.0 Hz, 2H), 3.94 (s, 3H), 3.91 (s, 3H), 1.42 (t, *J* = 7.0 Hz, 3H). <sup>13</sup>C NMR (125 MHz, CDCl<sub>3</sub>) δ 164.95, 149.37, 148.98, 135.98, 126.26, 123.76, 123.30, 121.92, 121.18, 120.03, 115.55, 112.40, 112.21, 111.54, 103.90, 59.44, 55.97, 55.93, 14.60. Characterization data is consistent with literature<sup>4</sup>.

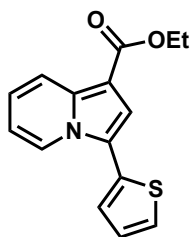

3q

**Ethyl 3-(thiophen-2-yl)indolizine-1-carboxylate (3q)**, 34 mg, 64%, white solid, m. p. 76-78 °C. <sup>1</sup>H NMR (500 MHz, CDCl<sub>3</sub>) δ 8.40 (dt, *J* = 7.0, 1.0 Hz, 1H), 8.28 (dt, *J* = 9.0, 1.5 Hz, 1H), 7.45-7.39 (m, 2H), 7.27 (d, *J* = 1.5 Hz, 1H), 7.19 (dd, *J* = 5.0, 3.5 Hz, 1H), 7.13-7.09 (m, 1H), 6.79 (td, *J* = 7.0, 1.5 Hz, 1H), 4.40 (q, *J* = 7.0 Hz, 2H), 1.44 (t, *J* = 7.0 Hz, 3H). <sup>13</sup>C NMR (125 MHz, CDCl<sub>3</sub>) δ 164.81, 136.60, 132.34, 127.69, 126.24, 125.84, 123.80, 122.49, 120.06, 119.17, 117.47, 112.95, 104.39, 59.63, 14.66. Characterization data is consistent with literature<sup>3</sup>.

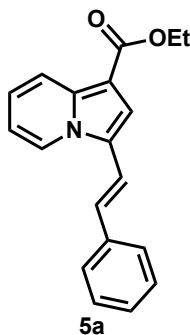

**Ethyl (E)-3-styrylindolizine-1-carboxylate (5a)**, 23 mg, total isolated yield: 40%, *E/Z* = 3.3:1, yellow solid, m. p. 90-92 °C. <sup>1</sup>H NMR (500 MHz, CDCl<sub>3</sub>) δ 8.25 (dt, *J* = 9.0, 1.0 Hz, 1H), 8.19 (dt, *J* = 7.0, 1.0 Hz, 1H), 7.58-7.56 (m, 1H), 7.55-7.51 (m, 2H), 7.42-7.37 (m, 2H), 7.31-7.28 (m, 1H), 7.23 (d, *J* = 16.0 Hz, 1H), 7.13 (d, *J* = 16.0 Hz, 1H), 7.11-7.08 (m, 1H), 6.83 (td, *J* = 7.0, 1.5 Hz, 1H), 4.41 (q, *J* = 7.0 Hz, 2H), 1.45 (t, *J* = 7.0 Hz, 3H). <sup>13</sup>C NMR (125 MHz, CDCl<sub>3</sub>) δ 164.83, 137.28, 136.49, 128.80, 128.18, 127.62, 126.21, 124.55, 122.93, 122.20, 120.25, 114.49, 113.98, 113.02, 105.00, 59.66, 14.66. Characterization data is consistent with literature<sup>5</sup>.

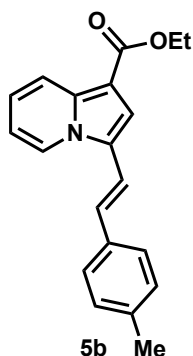

**Ethyl (E)-3-(4-methylstyryl)indolizine-1-carboxylate (5b)**, 27 mg, total isolated yield: 45%, *E/Z*= 7.4:1, yellow solid, m. p. 79-81 °C. <sup>1</sup>H NMR (500 MHz, CDCl<sub>3</sub>) δ 8.24 (dt, *J* = 9.0, 1.0 Hz, 1H), 8.16 (dt, *J* = 7.0, 1.0 Hz, 1H), 7.54 (s, 1H), 7.43 (d, *J* = 8.0 Hz, 2H), 7.19 (d, *J* = 8.0 Hz, 2H), 7.16 (d, *J* = 16.0 Hz, 1H), 7.10 (d, *J* = 16.0 Hz, 1H), 7.10-7.06 (m, 1H), 6.81 (td, *J* = 7.0, 1.5 Hz, 1H), 4.41 (q, *J* = 7.0 Hz, 2H), 2.39 (s, 3H), 1.45 (t, *J* = 7.0 Hz, 3H). <sup>13</sup>C NMR (125 MHz, CDCl<sub>3</sub>) δ 164.87, 137.60, 136.40, 134.50, 129.52, 128.31, 126.15, 124.74, 122.93, 122.07, 120.23, 113.72, 113.54, 112.94, 104.91, 59.64, 21.28, 14.67. HRMS (ESI) *m/z* calculated for [C<sub>20</sub>H<sub>19</sub>NO<sub>2</sub>+H]<sup>+</sup> 306.1488, found 306.1481.

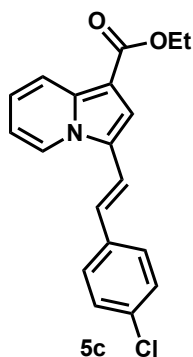

**Ethyl (E)-3-(4-chlorostyryl)indolizine-1-carboxylate (5c)**, 32 mg, total isolated yield: 50%, *E/Z*= 3.8:1, yellow solid, m. p. 109-111 °C. <sup>1</sup>H NMR (500 MHz, CDCl<sub>3</sub>) δ 8.25 (dt, *J* = 9.0, 1.0 Hz, 1H), 8.18 (dt, *J* = 7.0, 1.1 Hz, 1H), 7.56 (s, 1H), 7.44 (d, *J* = 8.5 Hz, 2H), 7.34 (d, *J* = 8.5 Hz, 2H), 7.21-7.19 (m, 1H), 7.13-7.08 (m, 1H), 7.06 (d, *J* = 16.0 Hz, 1H), 6.84 (td, *J* = 7.0, 1.5 Hz, 1H), 4.40 (q, *J* = 7.0 Hz, 2H), 1.44 (t, *J* = 7.0 Hz, 3H). HRMS (ESI) *m/z* calculated for [C<sub>19</sub>H<sub>16</sub>NO<sub>2</sub>+H]<sup>+</sup> 326.0942, found 326.0938.

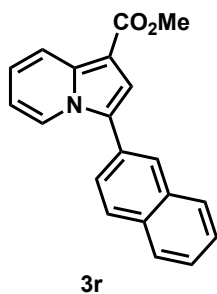

**Methyl 3-(naphthalen-2-yl)indolizine-1-carboxylate (3r)**, 44 mg, 74%, white solid, m. p. 118-120 °C. <sup>1</sup>H NMR (500 MHz, CDCl<sub>3</sub>) δ 8.39 (dt, *J* = 7.0, 1.0 Hz, 1H), 8.32 (dt, *J* = 9.0, 1.0 Hz, 1H), 8.01 (d, *J* = 1.0 Hz, 1H), 7.96 (d, *J* = 8.5 Hz, 1H), 7.92-7.86 (m, 2H), 7.64 (dd, *J* = 8.5, 2.0 Hz, 1H), 7.57-7.52 (m, 2H), 7.42 (s, 1H), 7.13-7.09 (m, 1H), 6.73 (td, *J* = 7.0, 1.5 Hz, 1H), 3.96 (s, 3H). <sup>13</sup>C NMR (125 MHz, CDCl<sub>3</sub>) δ 165.32, 136.53, 133.54, 132.77, 128.77, 128.51, 127.94, 127.76, 127.31, 126.64, 126.41, 126.26, 123.34, 122.41, 120.14, 116.43, 112.73, 104.10, 50.91. Characterization data is consistent with literature<sup>6</sup>.

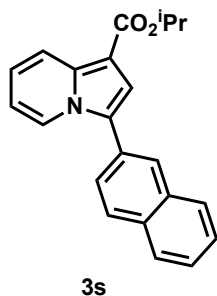

**Isopropyl 3-(naphthalen-2-yl)indolizine-1-carboxylate (3s)**, 49 mg, 75%, colorless oil. <sup>1</sup>H NMR (500 MHz, CDCl<sub>3</sub>) δ 8.40 (d, *J* = 7.0 Hz, 1H), 8.32 (d, *J* = 9.0 Hz, 1H), 8.03 (d, *J* = 0.9 Hz, 1H), 7.97 (d, *J* = 8.5 Hz, 1H), 7.93-7.87 (m, 2H), 7.67 (dd, *J* = 8.5, 2.0 Hz, 1H), 7.59-7.52 (m, 2H), 7.44 (s, 1H), 7.11 m, 1H), 6.74 (td, *J* = 7.0, 1.5 Hz, 1H), 5.37-5.31 (m, 1H), 1.44 (d, *J* = 6.5 Hz, 6H). <sup>13</sup>C NMR (125 MHz, CDCl<sub>3</sub>) δ 164.60, 136.37, 133.57, 132.76, 128.77, 128.64, 127.96, 127.79, 127.32, 126.64, 126.40, 126.33, 126.28, 123.33, 122.24, 120.26, 116.57, 112.65, 104.91, 66.68, 22.31. HRMS (ESI) *m/z* calculated for [C<sub>22</sub>H<sub>19</sub>NO<sub>2</sub>+H]<sup>+</sup> 330.1488, found 330.1480.

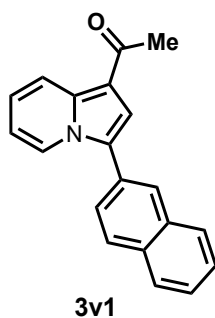

**1-(3-(Naphthalen-2-yl)indolizin-1-yl)ethan-1-one (3v1)**, 16 mg, 28%, white solid, m. p. 136-138 °C. <sup>1</sup>H NMR (500 MHz, CDCl<sub>3</sub>) δ 8.58 (dt, *J* = 9.0, 1.5 Hz, 1H), 8.40 (dt, *J* = 7.0, 1.0 Hz, 1H), 8.03 (s, 1H), 7.99 (d, *J* = 8.5 Hz, 1H), 7.94-7.88 (m, 2H), 7.66 (dd, *J* = 8.5, 1.5 Hz, 1H), 7.60-7.54 (m, 2H), 7.32 (s, 1H), 7.23-7.28 (m, 1H), 6.82 (td, *J* = 6.5, 1.5 Hz, 1H), 2.61 (s, 3H). <sup>13</sup>C NMR (125 MHz, CDCl<sub>3</sub>) δ 193.03, 136.07, 133.62, 132.89, 128.91, 128.45, 127.99, 127.85, 127.58, 126.78, 126.58, 126.34, 126.31, 123.97, 123.25, 121.19, 116.87, 113.76, 113.73, 28.03.

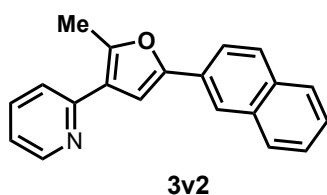

**2-(2-Methyl-5-(naphthalen-2-yl)furan-3-yl)pyridine (3v2)**, 36 mg, 63%, white solid, m. p. 96-98 °C. <sup>1</sup>H NMR (500 MHz, CDCl<sub>3</sub>) δ 8.70-8.68 (m, 1H), 8.19 (s, 1H), 7.92-7.80 (m, 4H), 7.71 (td, *J* = 8.0, 2.0 Hz, 1H), 7.53-7.44 (m, 3H), 7.18-7.13 (m, 2H), 2.78 (s, 3H). <sup>13</sup>C NMR (125 MHz, CDCl<sub>3</sub>) δ 153.17, 151.76, 151.07, 149.50, 136.28, 133.57, 132.58, 128.33, 128.08, 128.00, 127.72, 126.41, 125.74, 122.85, 122.13, 121.65, 121.08, 120.85, 106.13, 14.10.

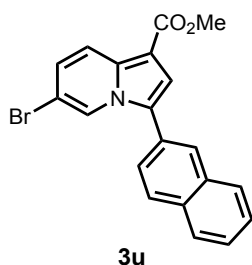

**Methyl 6-bromo-3-(naphthalen-2-yl)indolizine-1-carboxylate (3u)**, 53 mg, 70%, white solid, m. p. 176-178 °C. <sup>1</sup>H NMR (500 MHz, CDCl<sub>3</sub>) δ 8.48 (dd, *J* = 1.5, 1.0 Hz, 1H), 8.21 (dd, *J* = 9.5, 0.5 Hz, 1H), 8.01-7.97 (m, 2H), 7.94-7.89 (m, 2H), 7.62 (dd, *J*

= 8.5, 2.0 Hz, 1H), 7.59-7.54 (m, 2H), 7.38 (s, 1H), 7.15 (dd,  $J = 9.5, 2.0$  Hz, 1H), 3.95 (s, 3H).  $^{13}\text{C}$  NMR (125MHz,  $\text{CDCl}_3$ )  $\delta$  164.97, 134.48, 133.53, 132.98, 129.07, 128.07, 127.87, 127.84, 127.66, 126.82, 126.72, 126.10, 125.42, 123.29, 120.82, 116.81, 107.95, 105.36, 51.12.

## References

- [1] H. Sakaguchi, Y. Uetake, M. Ohashi, T. Niwa, S. Ogoshi and T. Hosoya, *J. Am. Chem. Soc.*, 2017, **139**, 12855.
- [2] R.-R. Liu, J.-J. Hong, C.-J. Lu, M. Xu, J.-R. Gao and Y.-X. Jia, *Org. Lett.*, 2015, **17**, 3050.
- [3] J. Gu and C. Cai, *Org. Biomol. Chem.*, 2016, **14**, 9966.
- [4] L.-K. Xiang, Y. Yang, X.-Q. Zhou, X.-X. Liu, X.-N. Li, X. Kang, R.-L. Yan, and G.-S. Huang, *J. Org. Chem.*, 2014, **79**, 10641.
- [5] H. Kim, S. Kim, J. Kim, J.-Y. Son, Y. Baek, K. Um and P. Lee, *Org. Lett.*, 2017, **19**, 5677.
- [6] J.-L. Liu, Y. Liang, H.-S. Wang and Y.-M. Pan, *Synlett*, 2015, **26**, 2024.

# <sup>1</sup>H, <sup>13</sup>C NMR Spectra of the Title Compounds

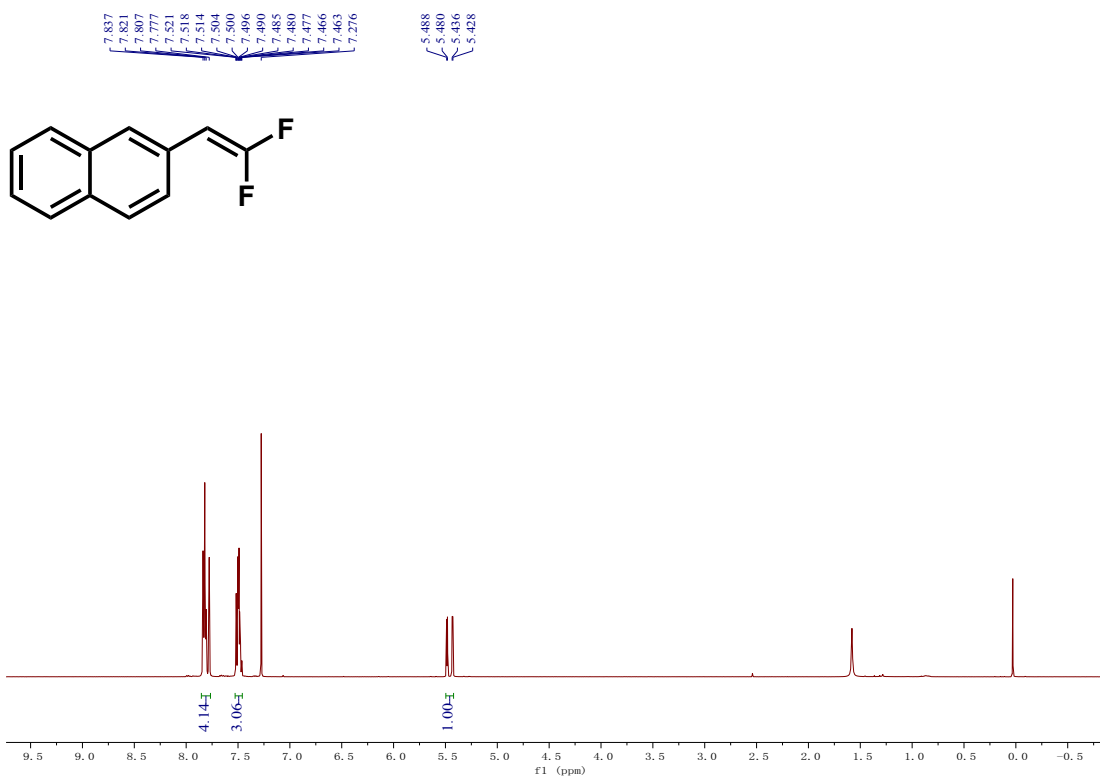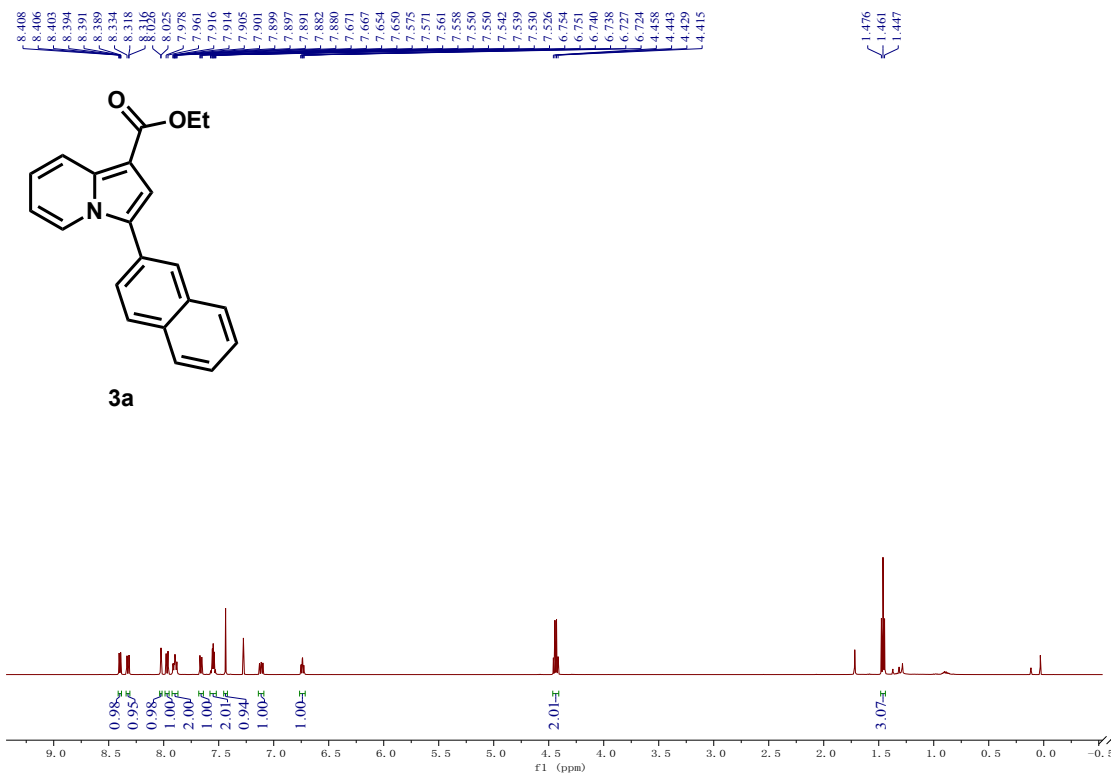



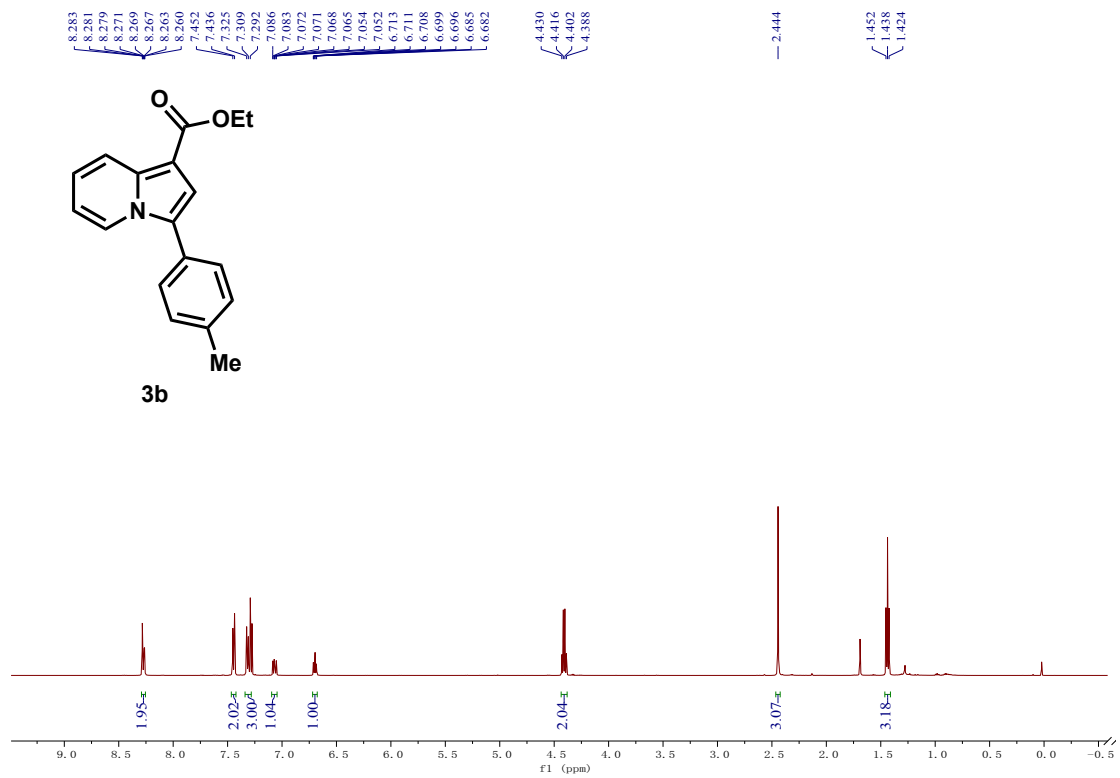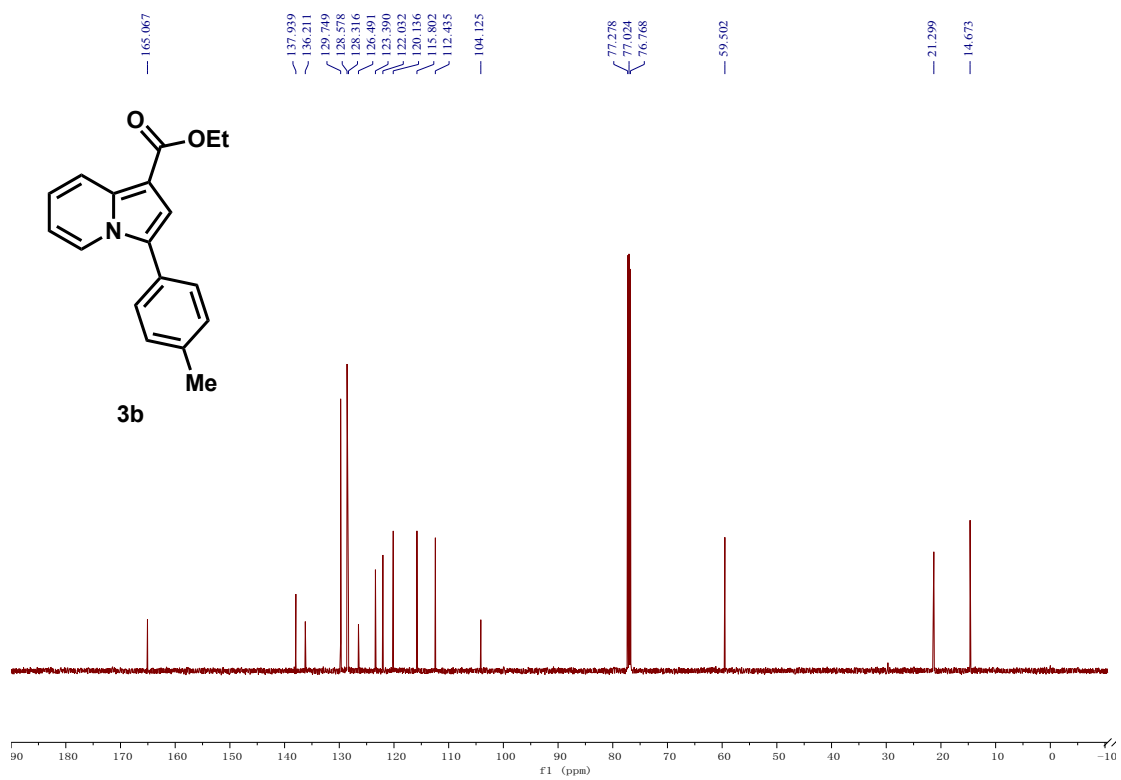

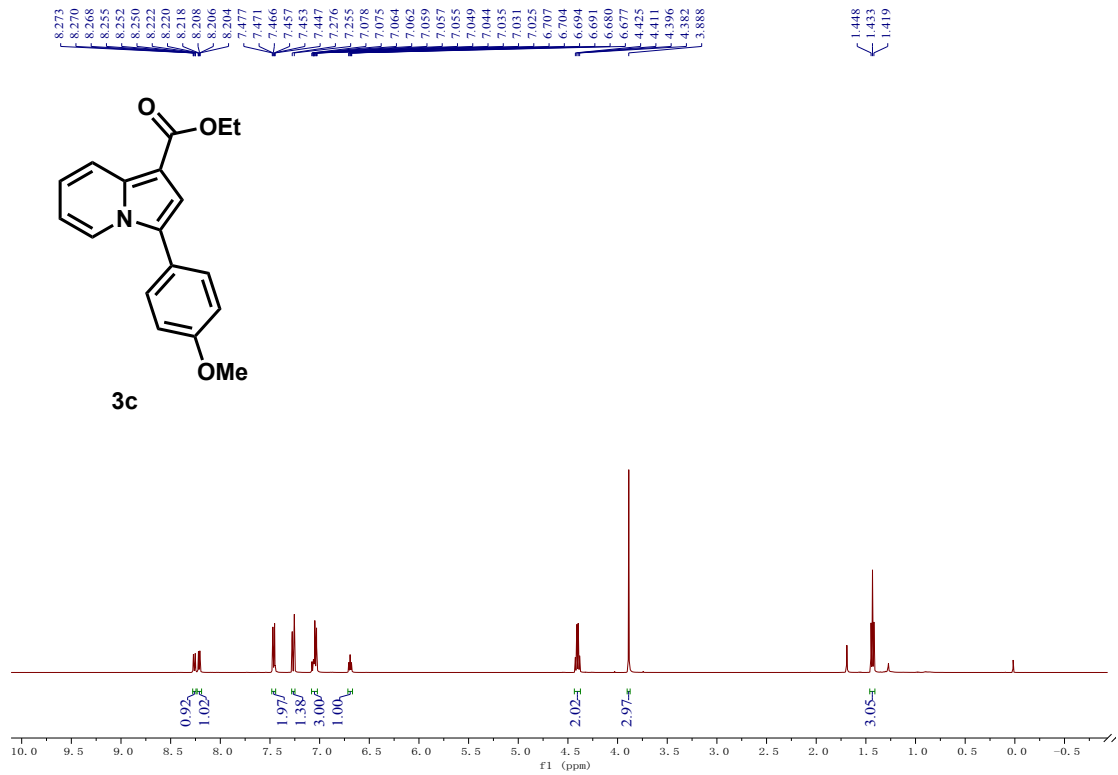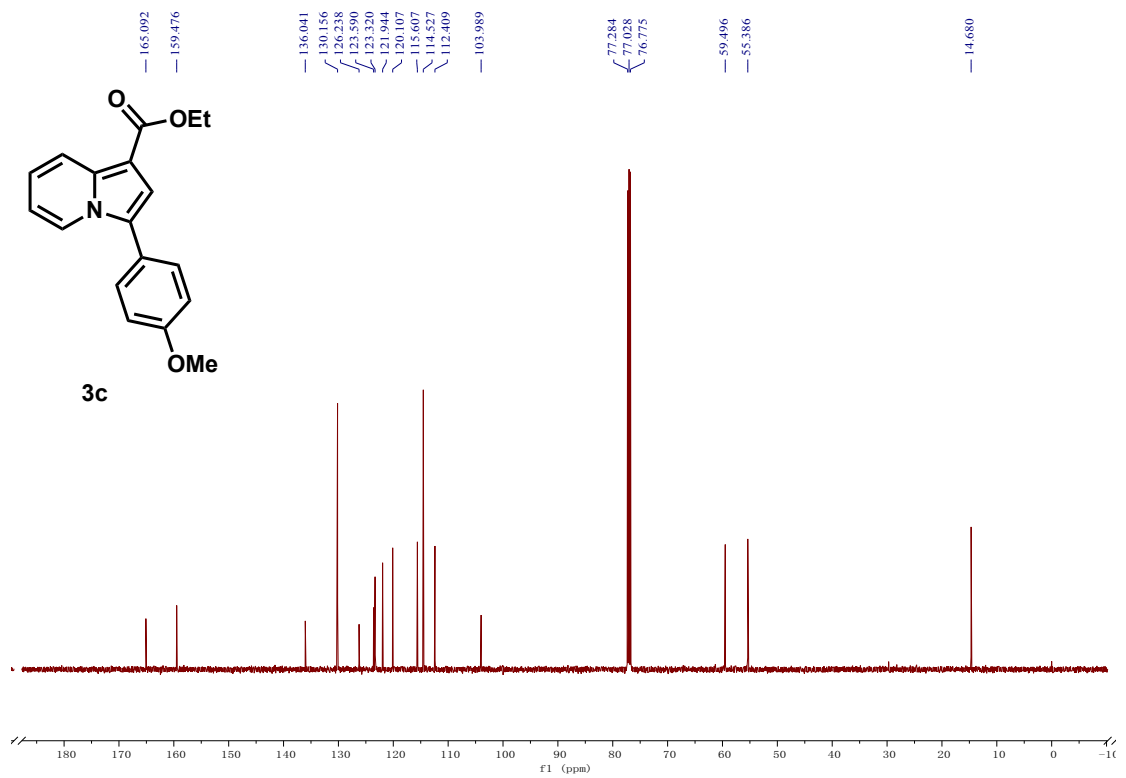

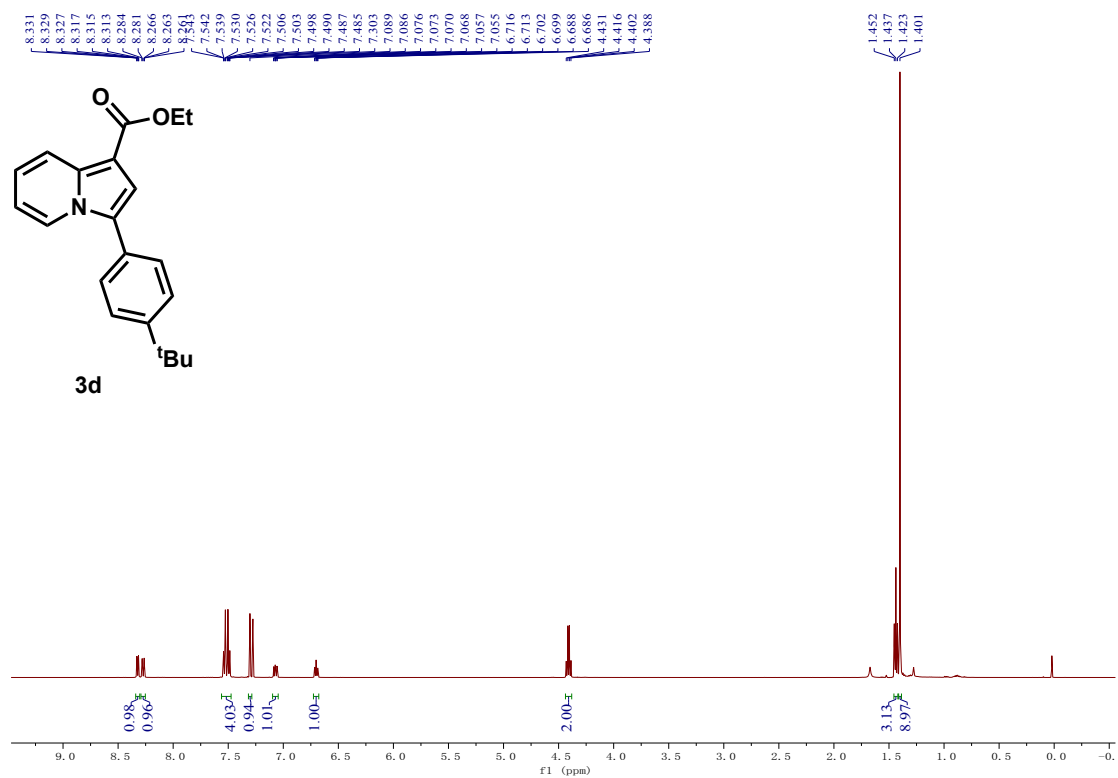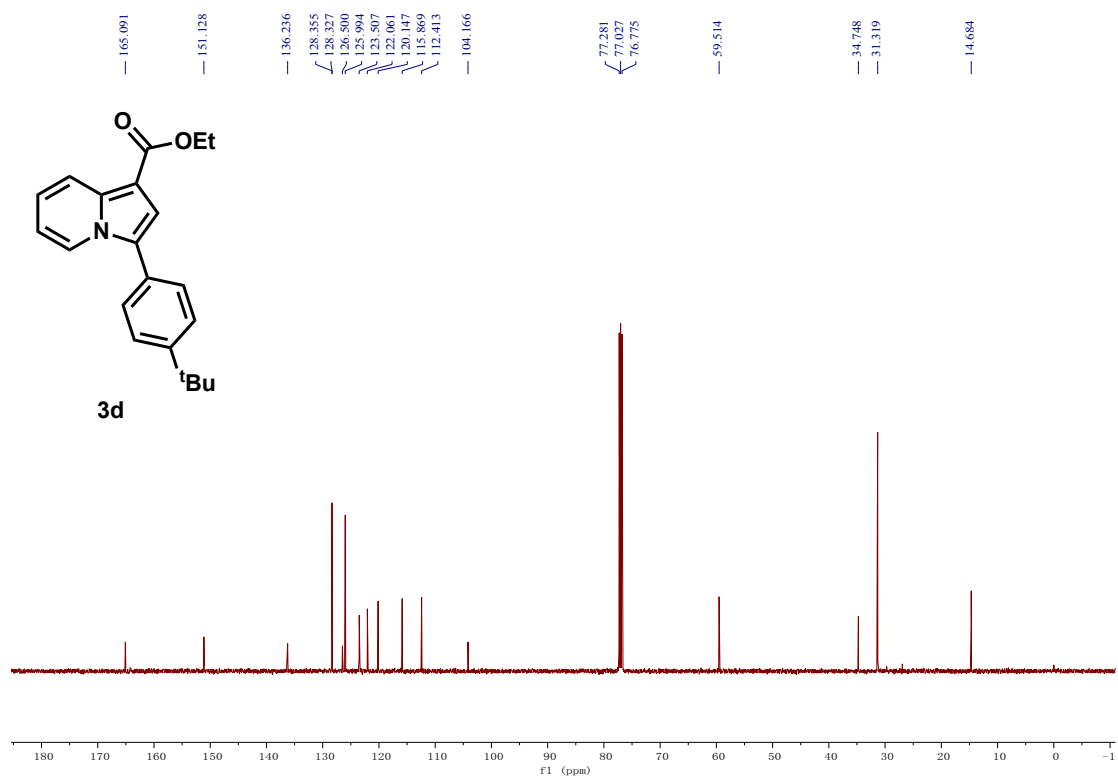

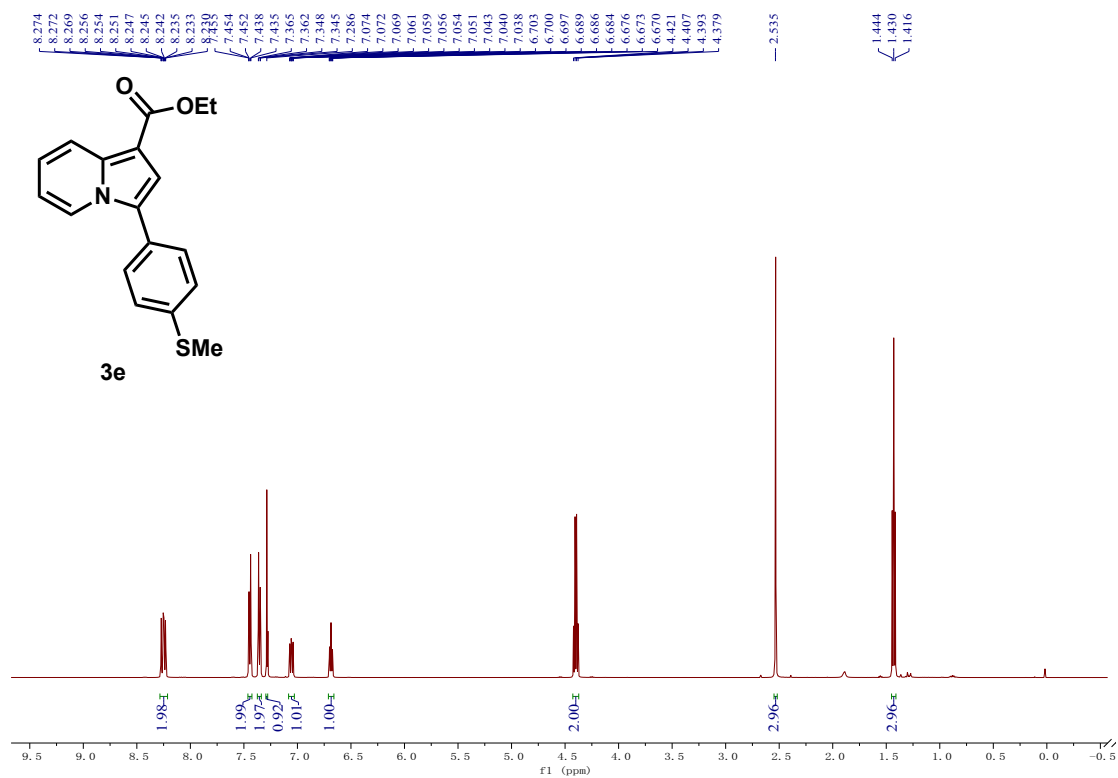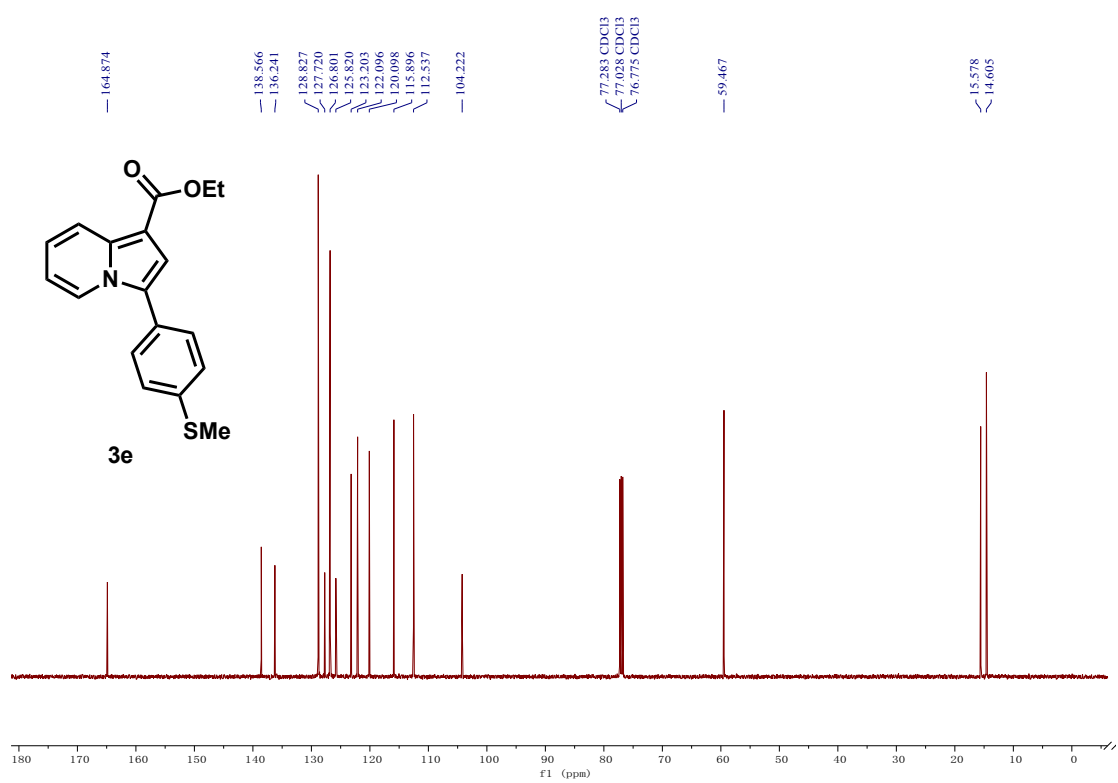

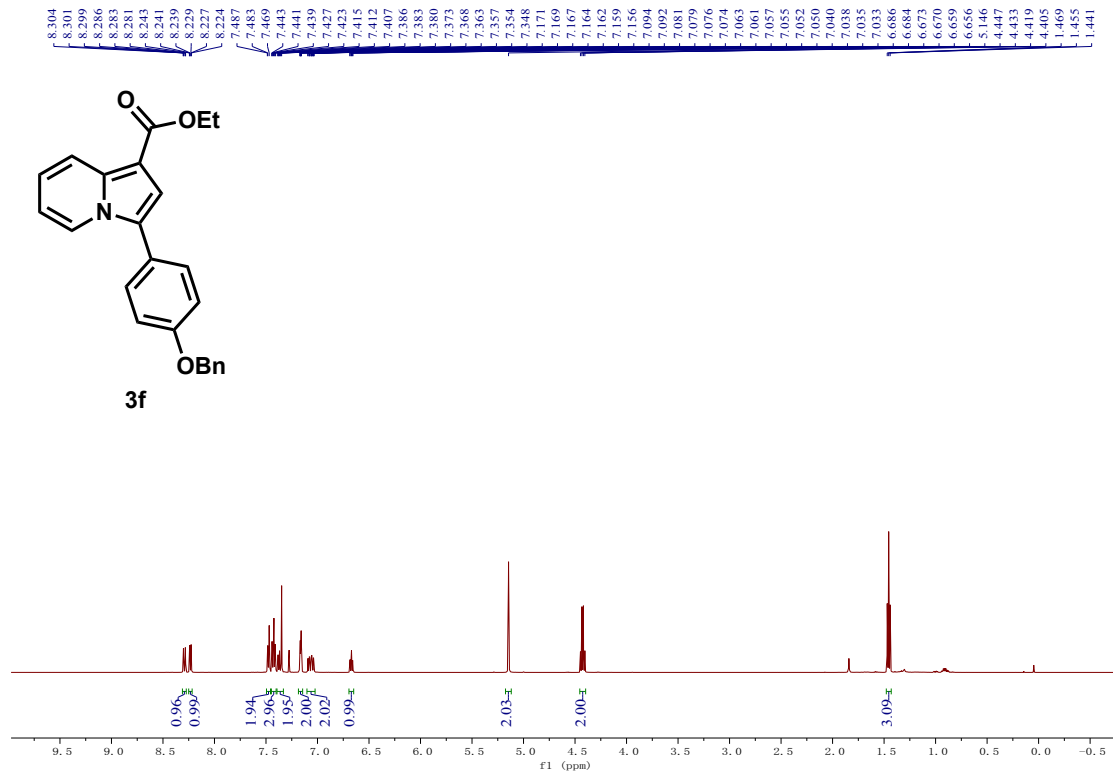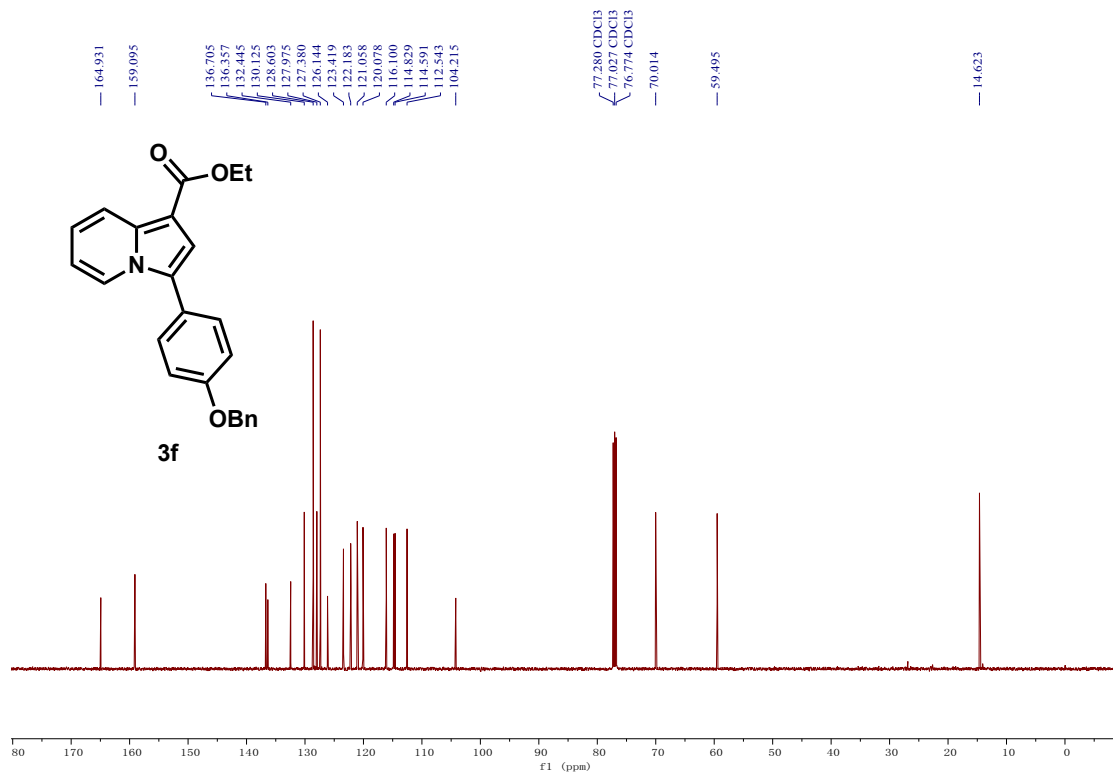

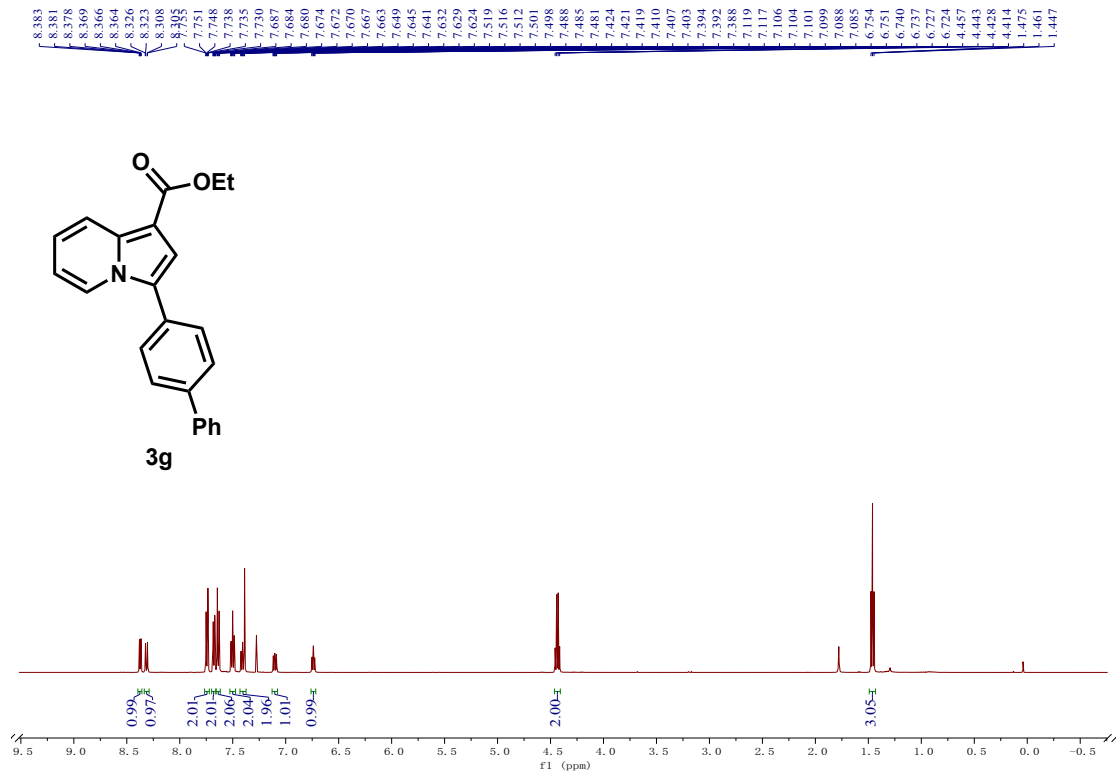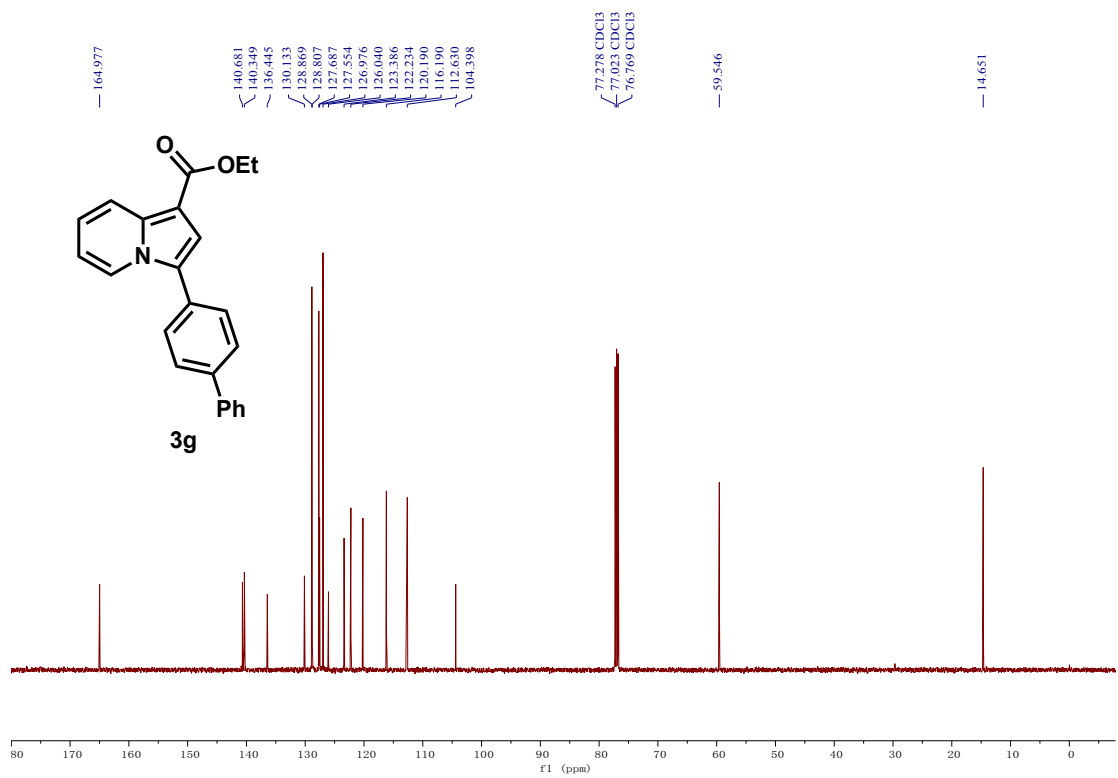

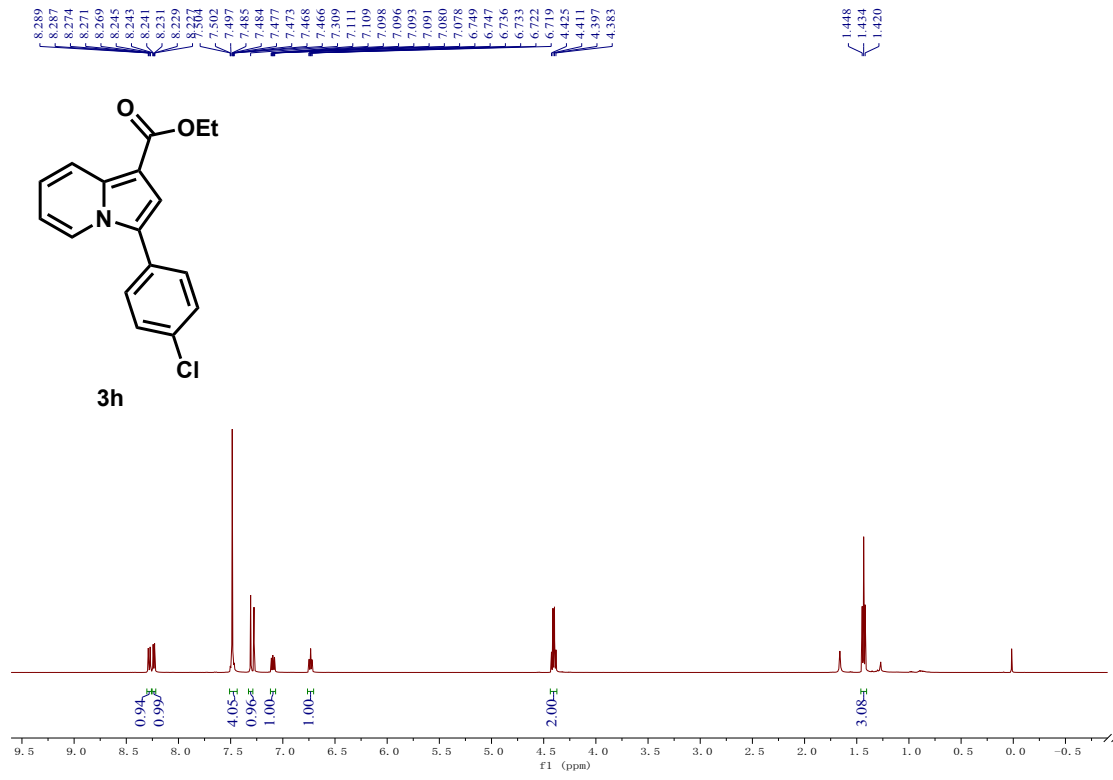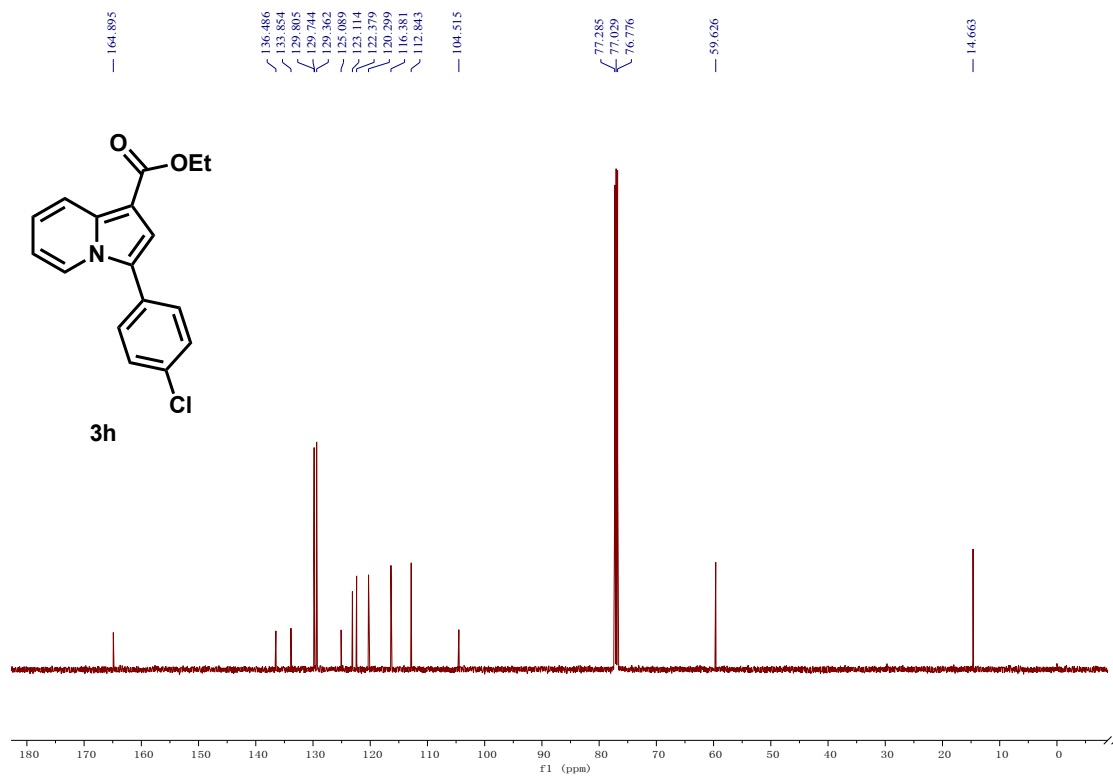

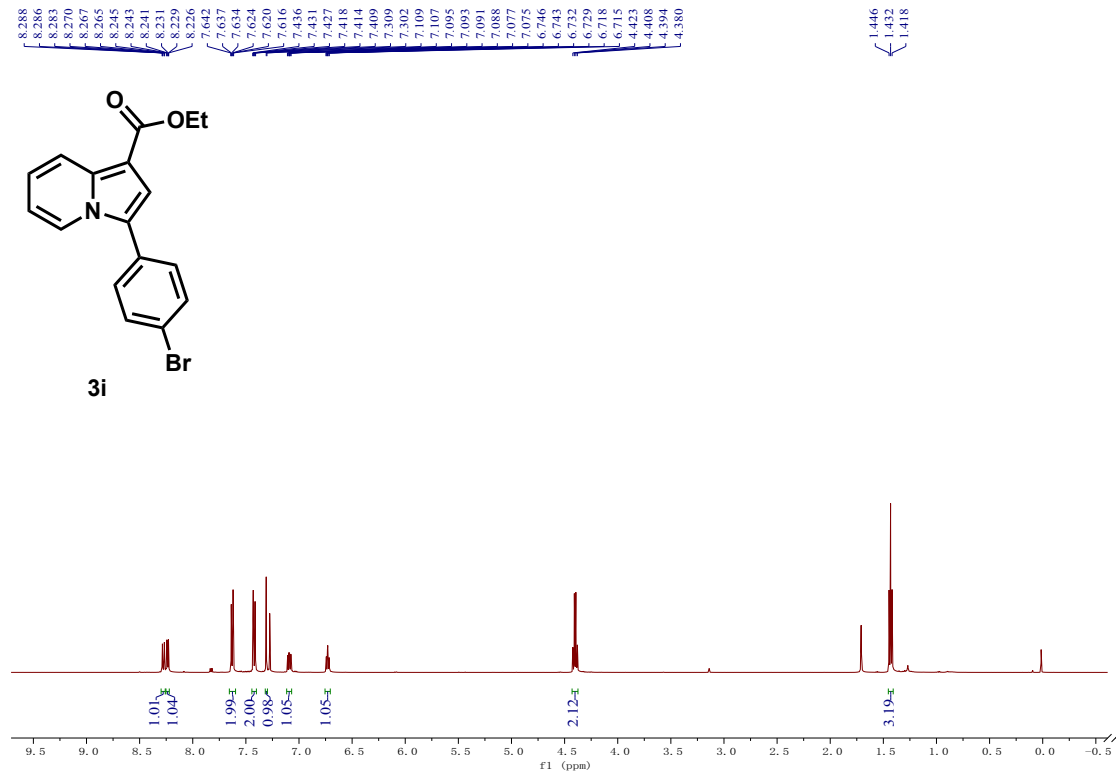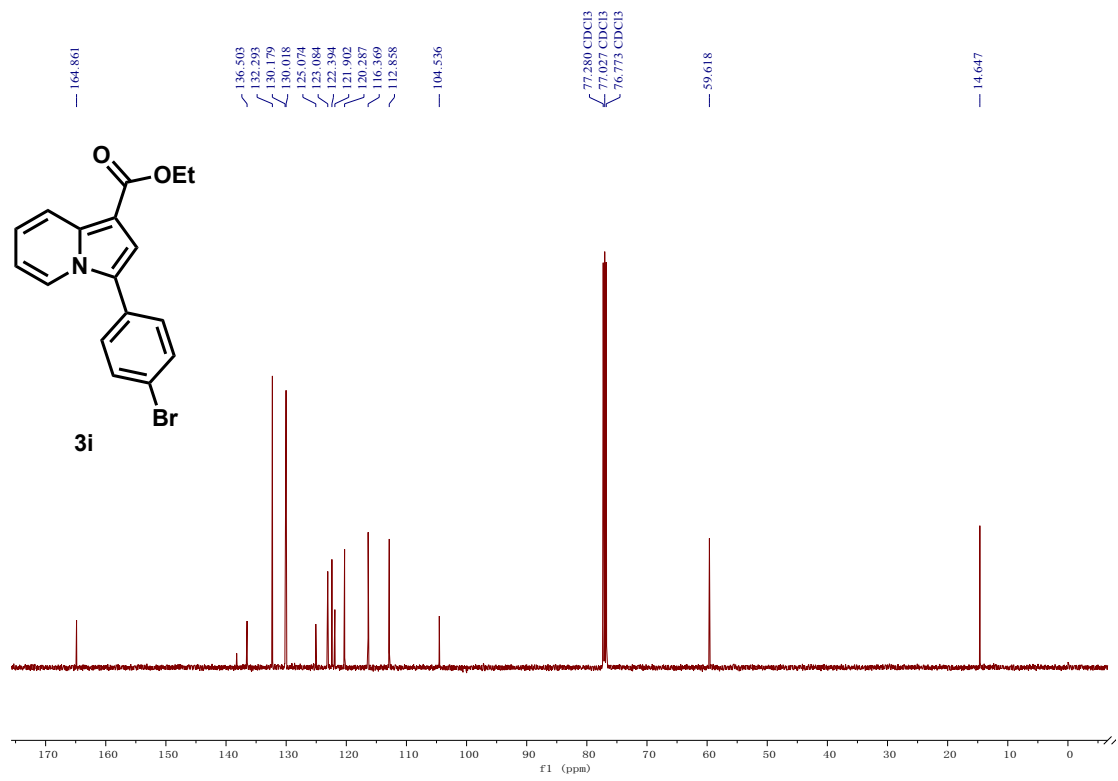



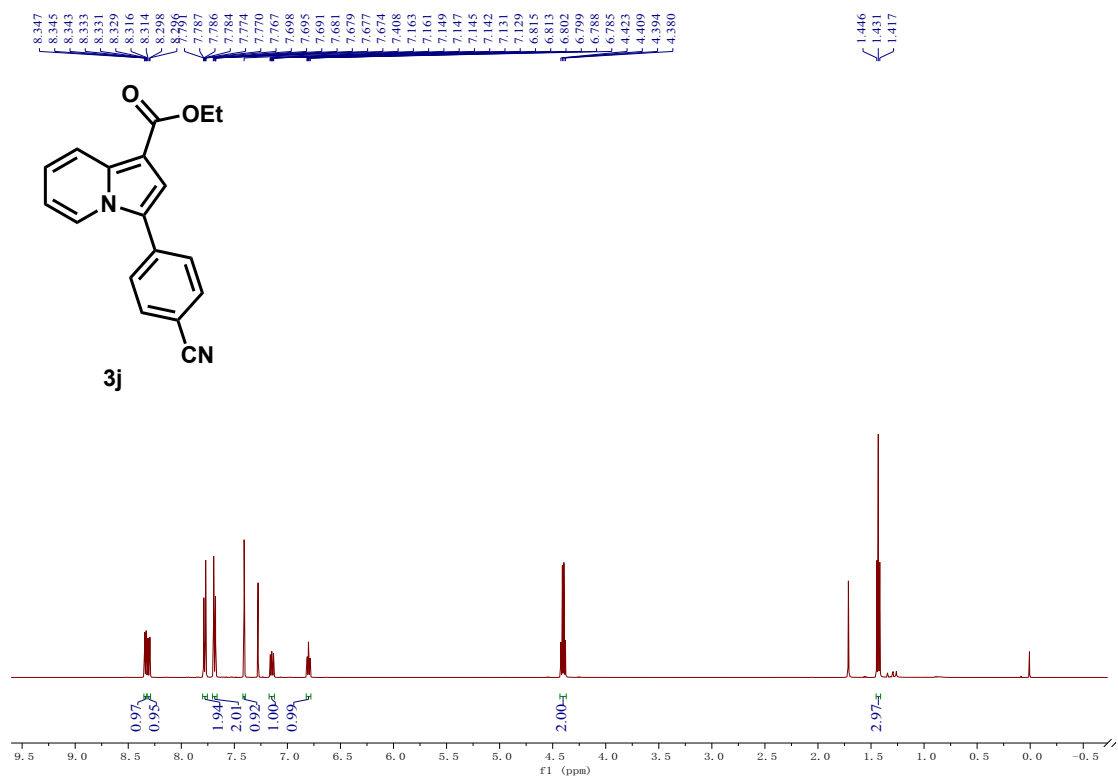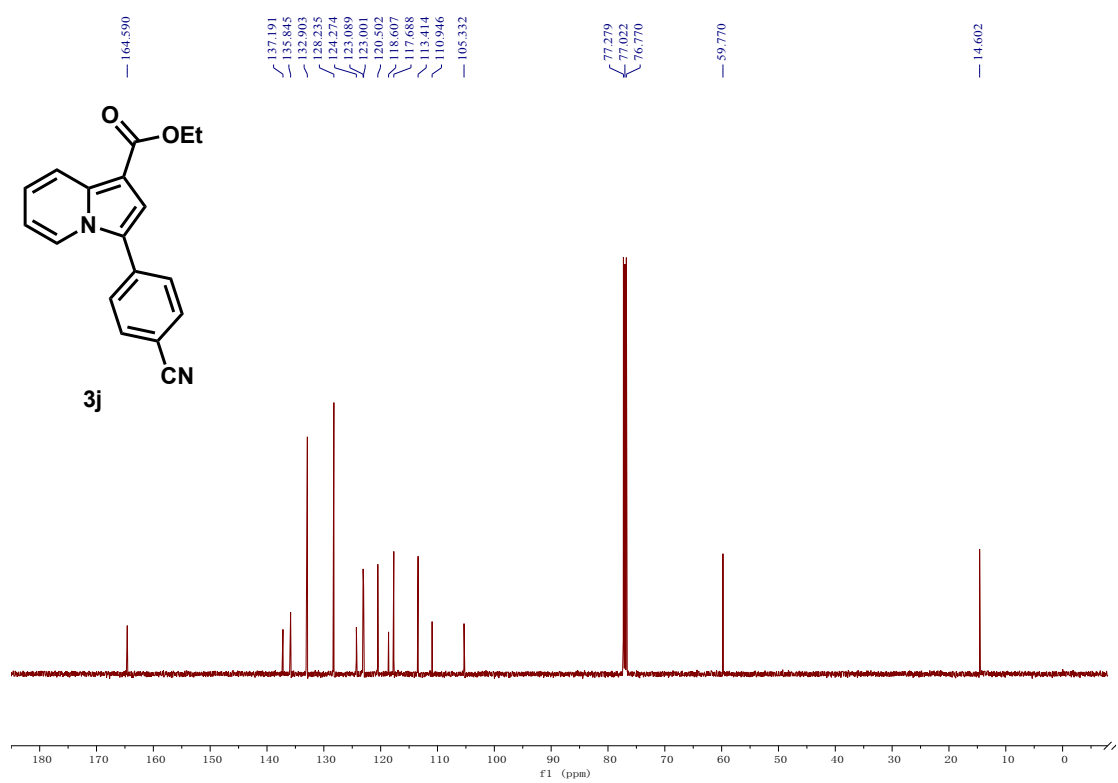

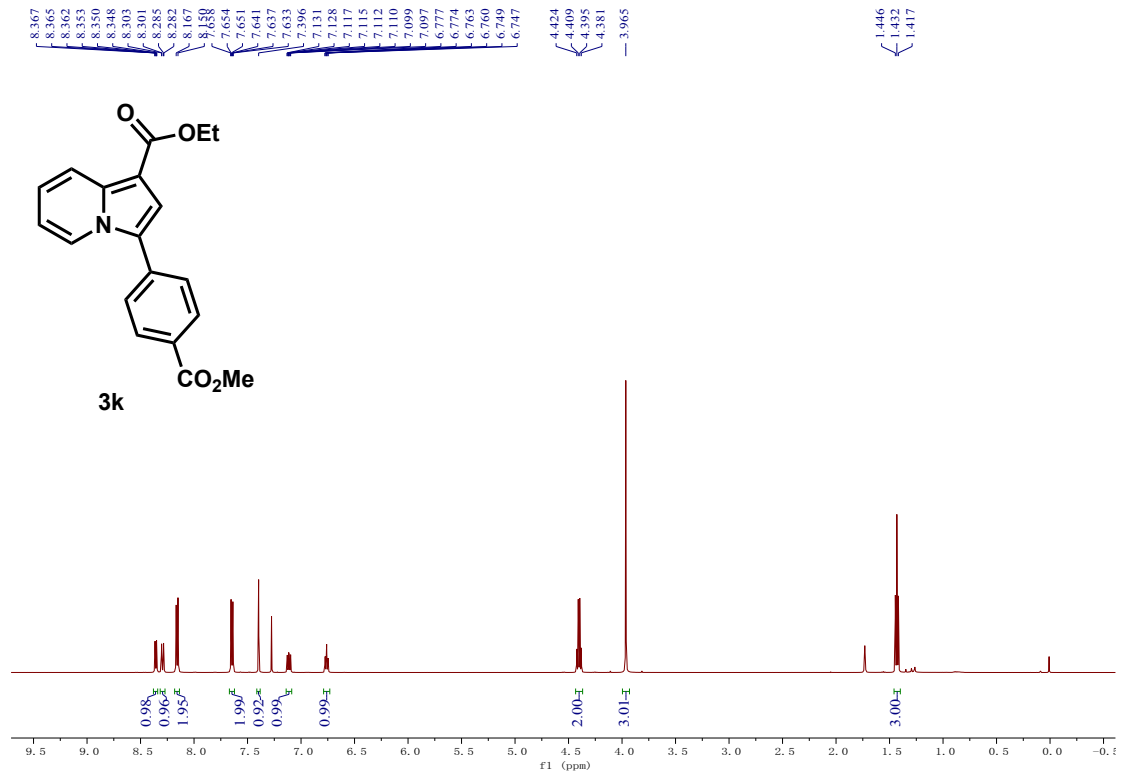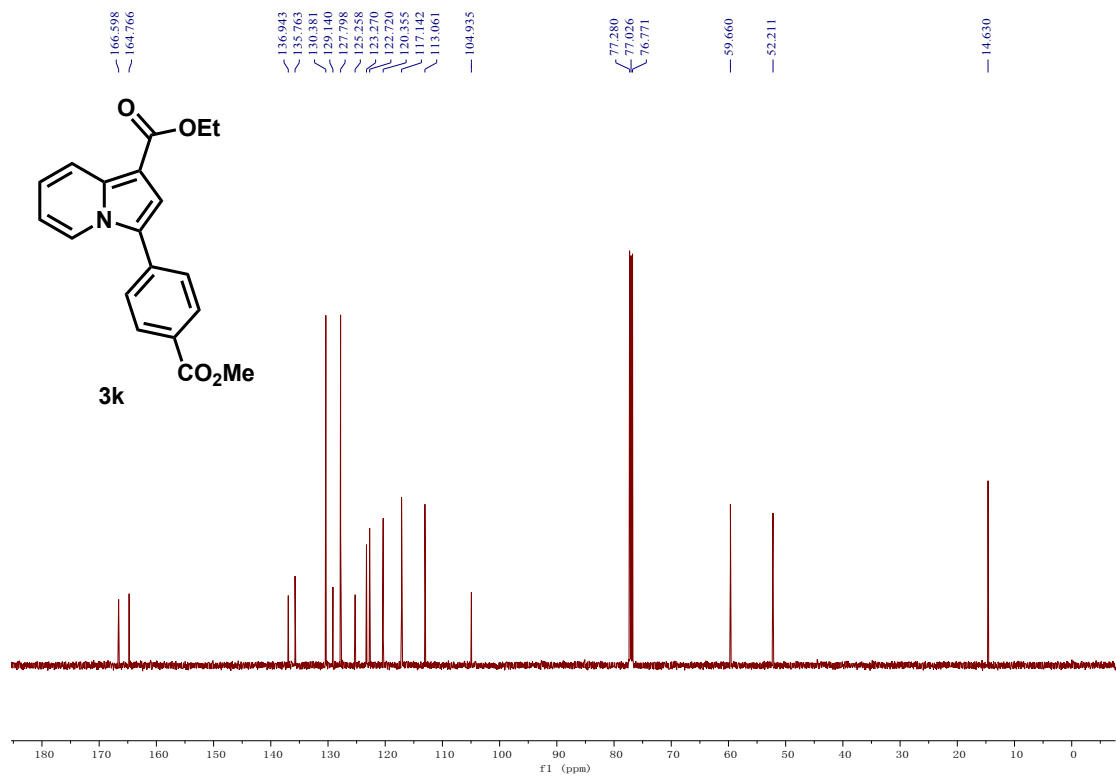

8.321  
8.318  
8.316  
8.306  
8.304  
8.302  
8.286  
8.284  
8.268  
8.265  
8.243  
7.399  
7.398  
7.384  
7.383  
7.378  
7.376  
7.374  
7.372  
7.370  
7.367  
7.363  
7.355  
7.352  
7.349  
7.308  
7.296  
7.292  
7.237  
7.235  
7.226  
7.224  
7.222  
7.094  
7.092  
7.081  
7.079  
7.076  
7.074  
7.063  
7.061  
6.726  
6.723  
6.712  
6.709  
6.699  
6.696  
4.429  
4.414  
4.400  
4.386  
4.386  
2.443  
1.452  
1.438  
1.423

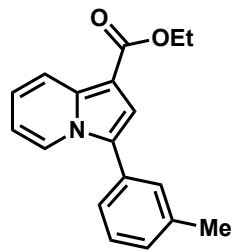

3I

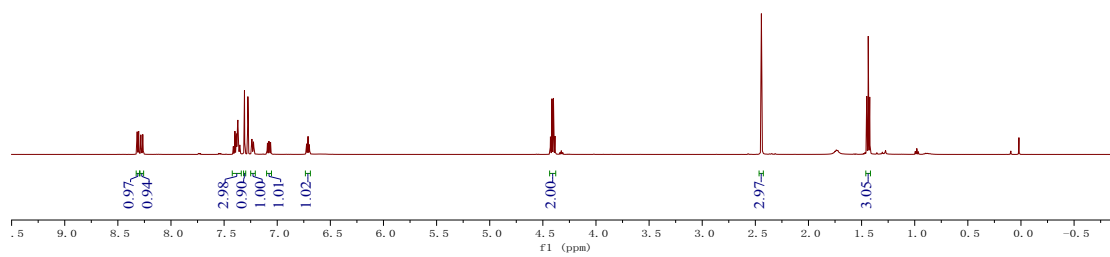

165.070  
138.842  
136.306  
131.186  
129.343  
128.929  
128.787  
126.591  
125.606  
123.466  
122.128  
120.151  
115.998  
112.492  
104.191  
77.281  
77.027  
76.774  
59.527  
21.481  
14.674

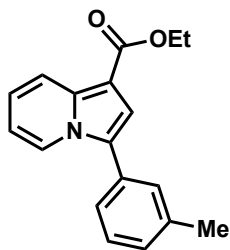

3I

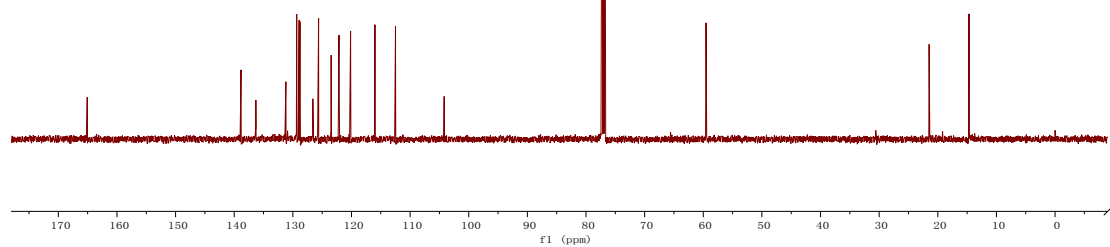

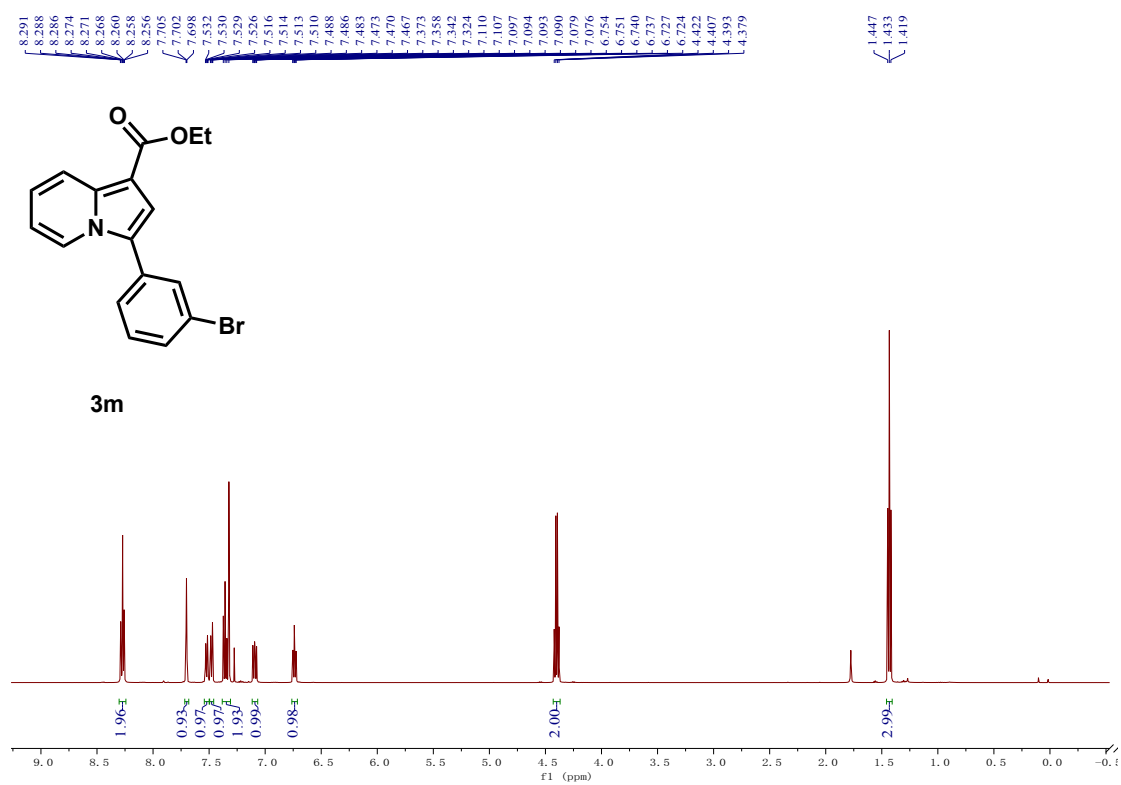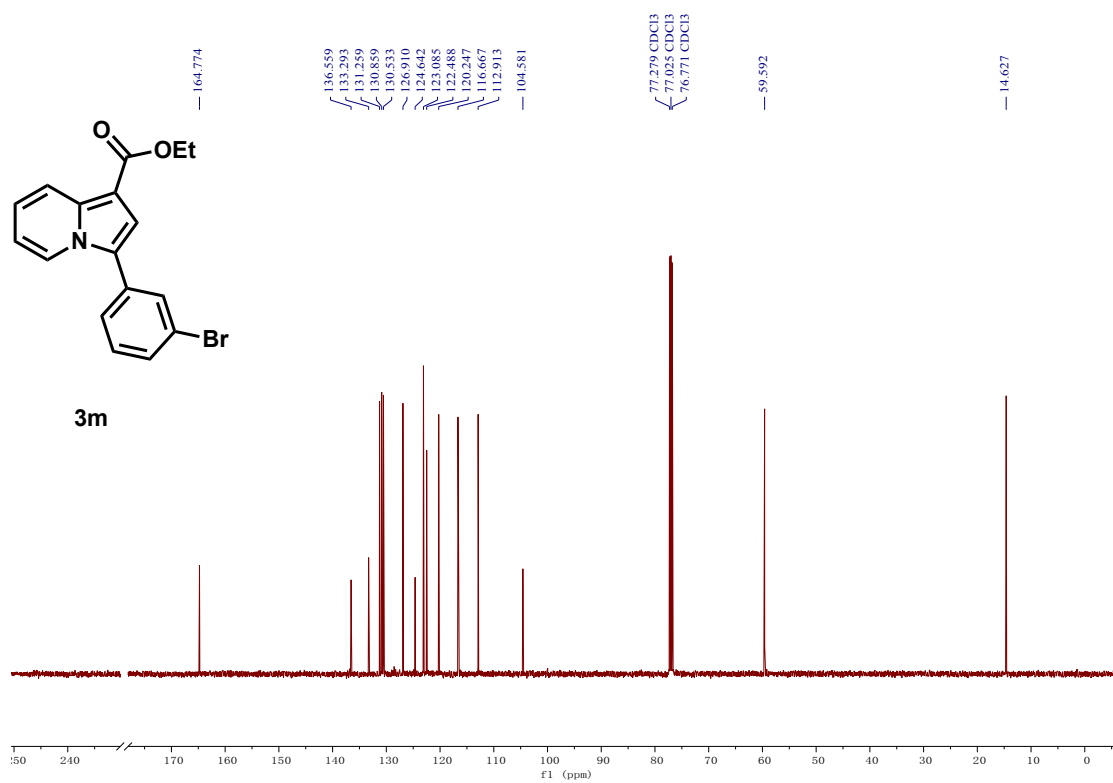

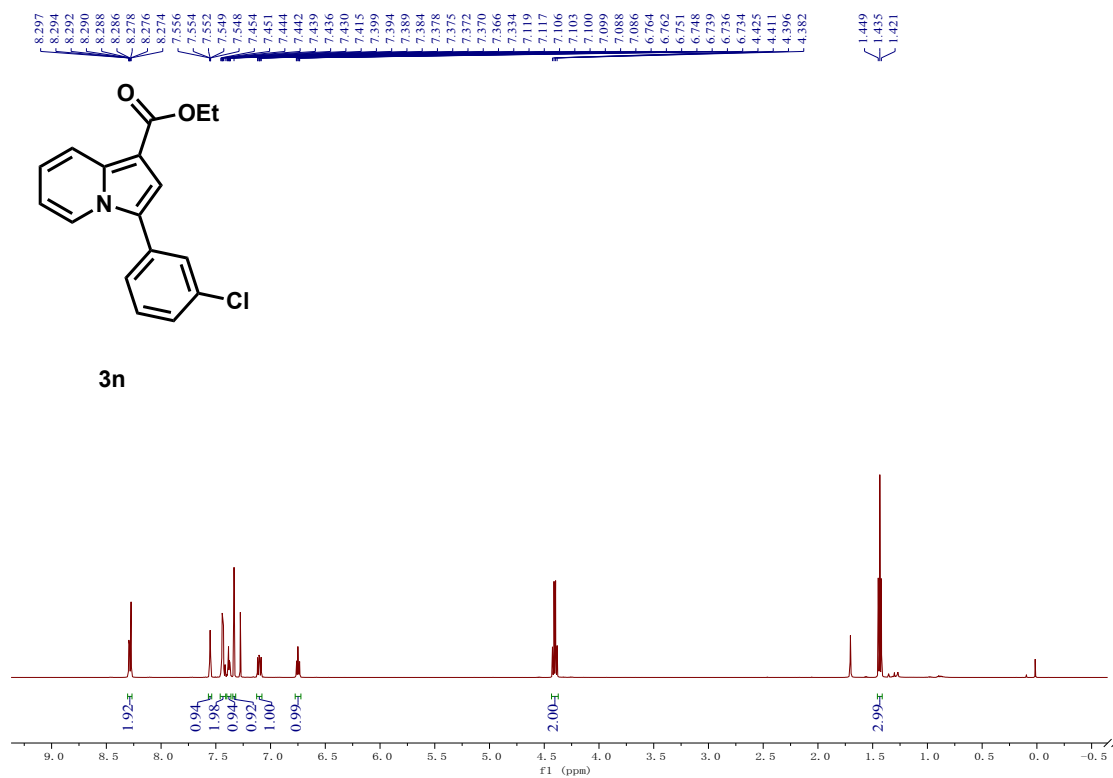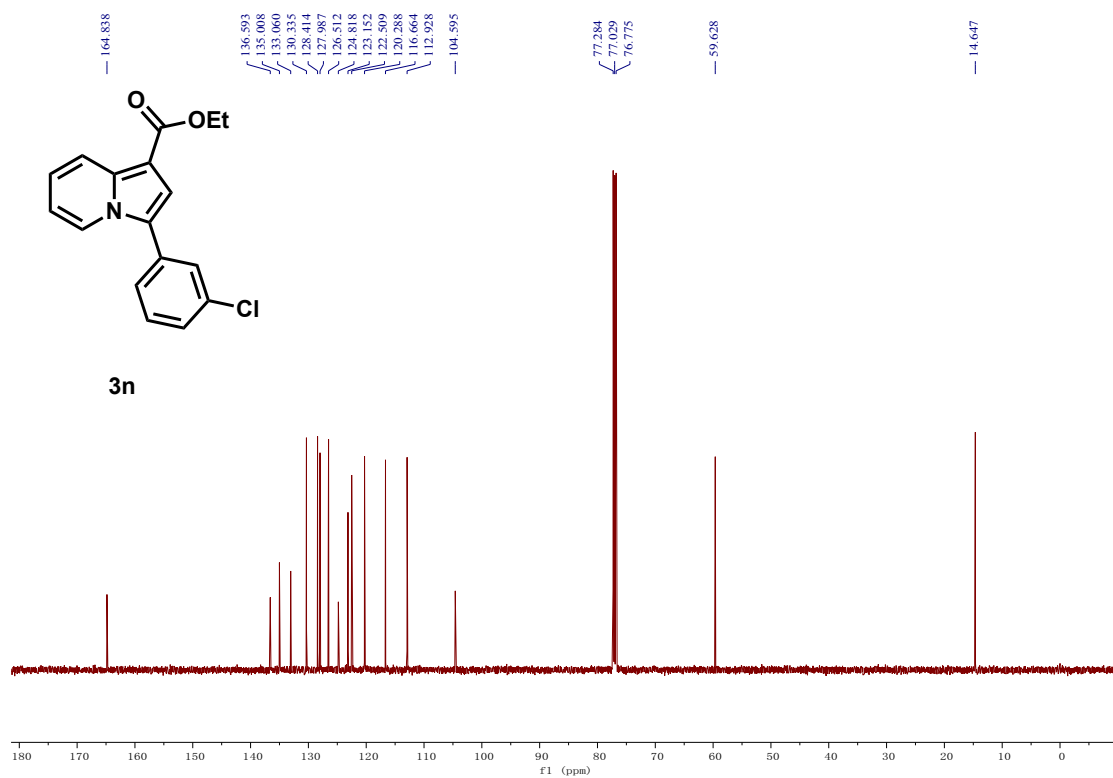

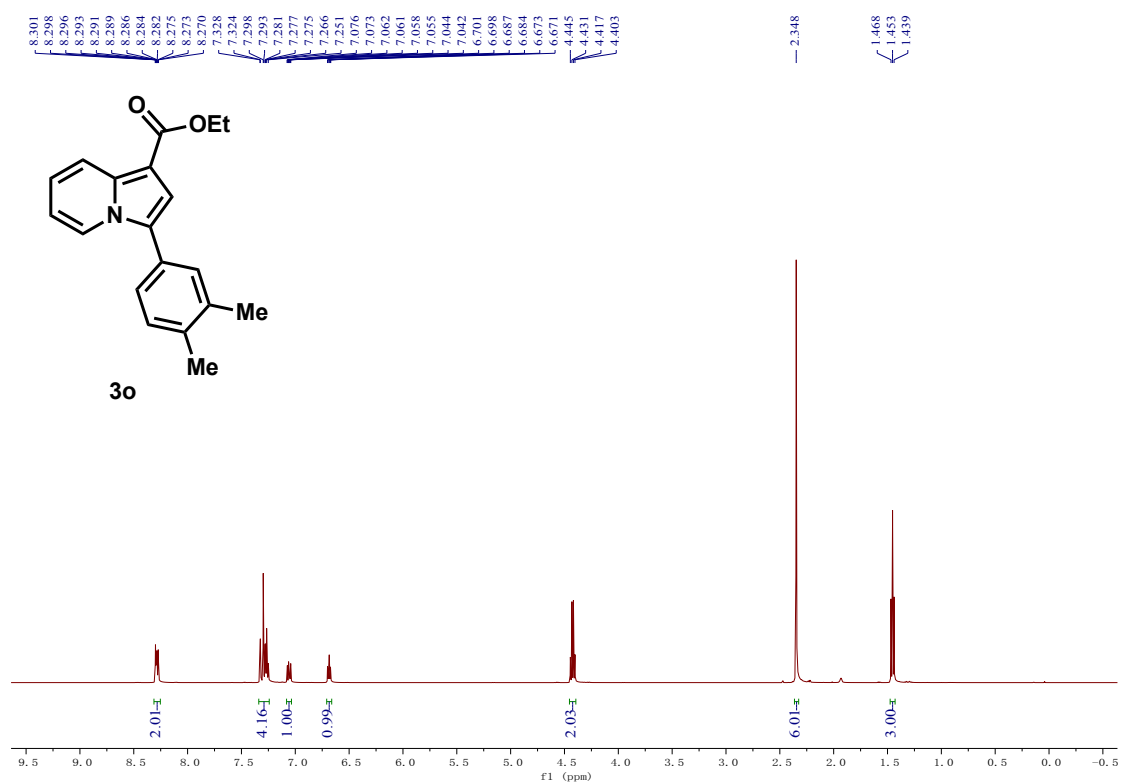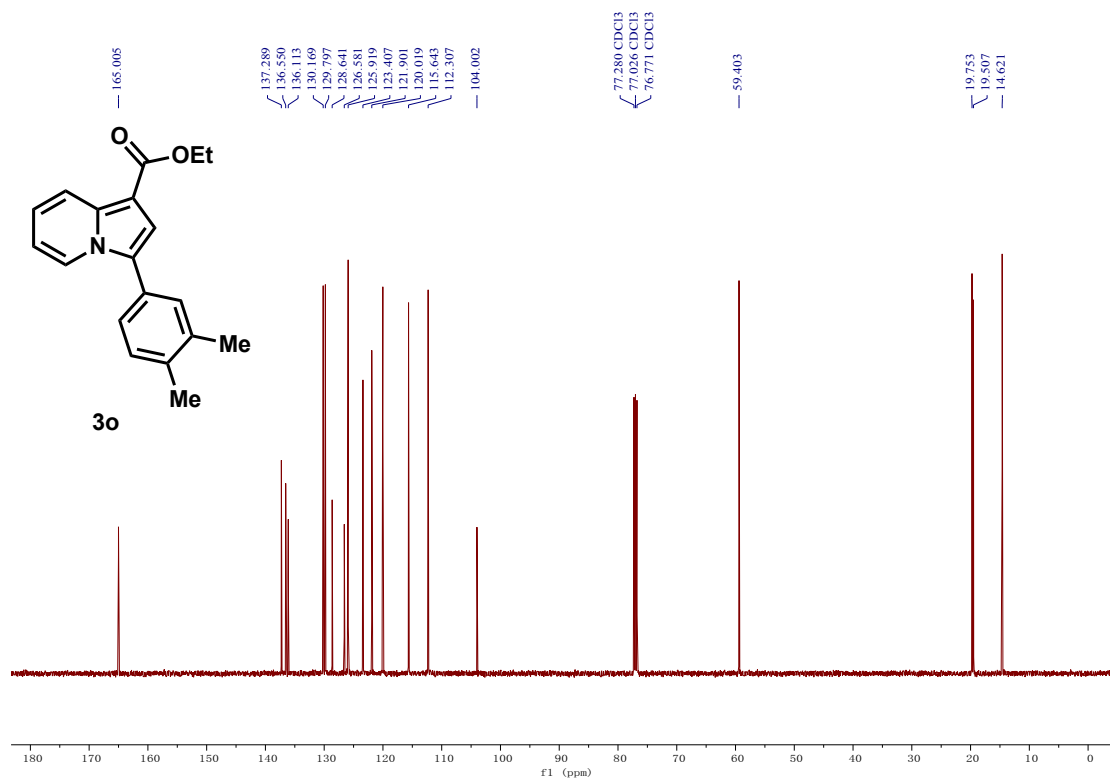

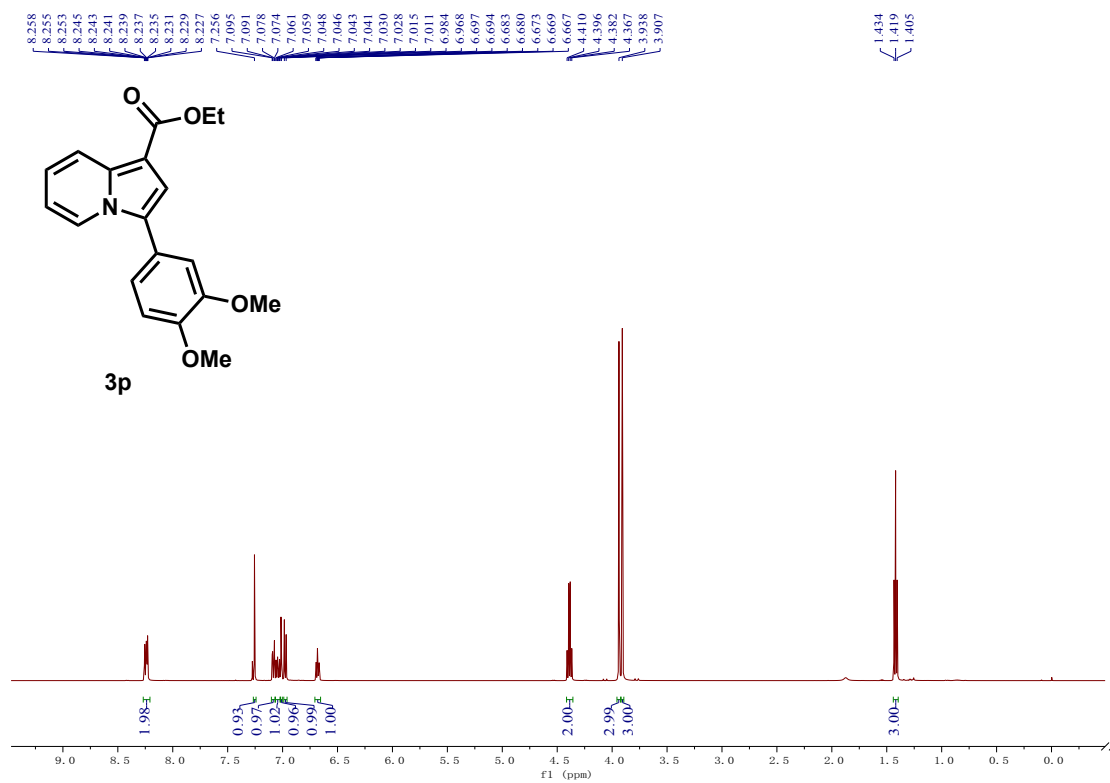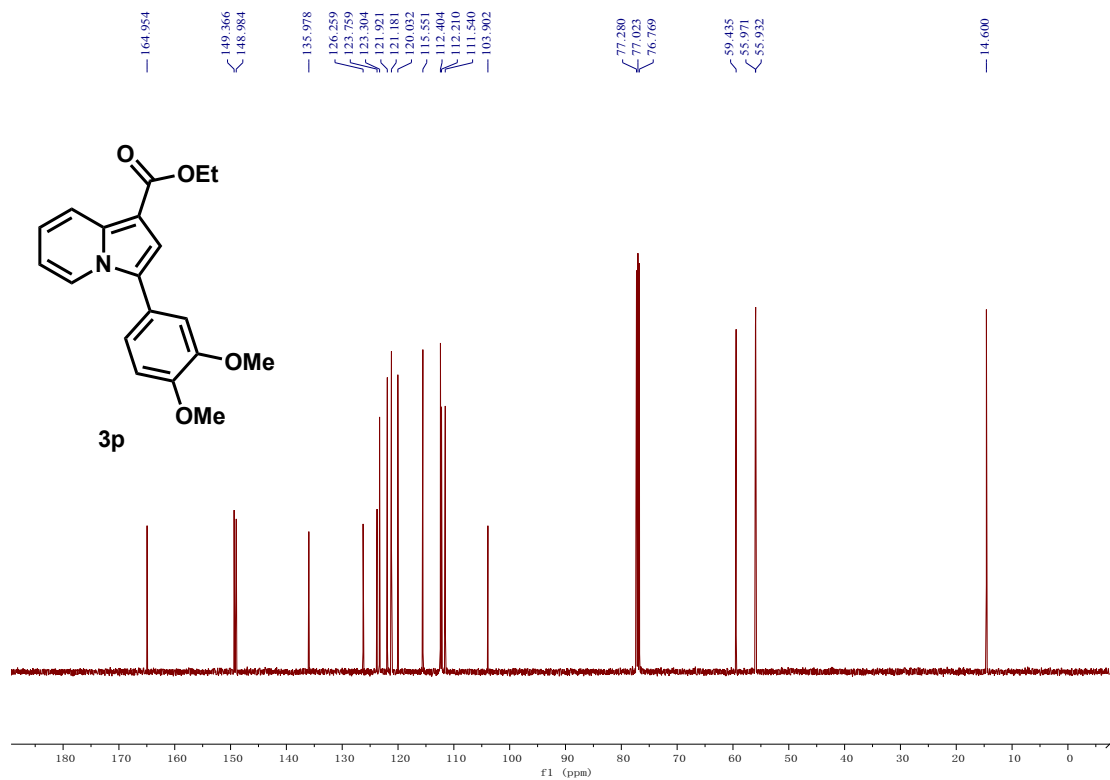

8.406  
8.404  
8.402  
8.392  
8.390  
8.387  
8.288  
8.286  
8.270  
8.273  
8.367  
7.427  
7.419  
7.416  
7.409  
7.402  
7.394  
7.276  
7.273  
7.197  
7.190  
7.187  
7.180  
7.128  
7.126  
7.115  
7.113  
7.110  
7.108  
7.097  
7.095  
6.987  
6.986  
6.988  
6.786  
6.784  
6.773  
6.770  
4.426  
4.411  
4.397  
4.383

1.449  
1.435  
1.421

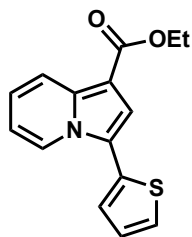

3q

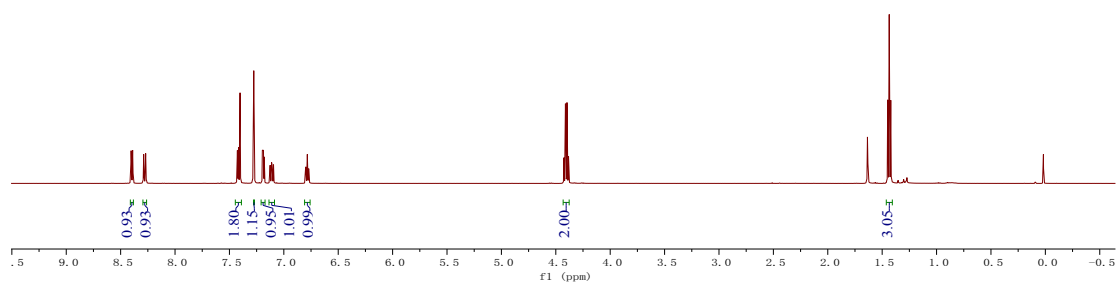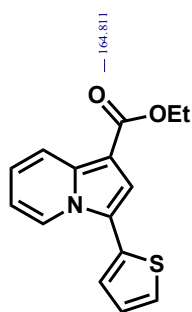

3q

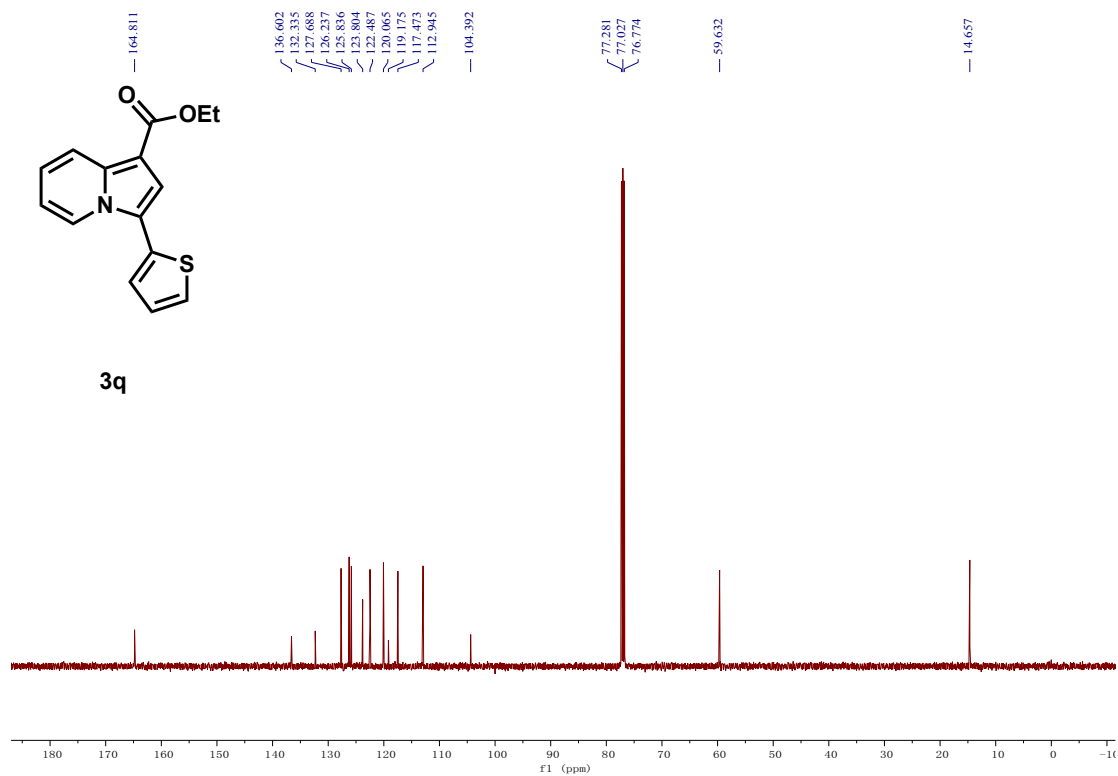



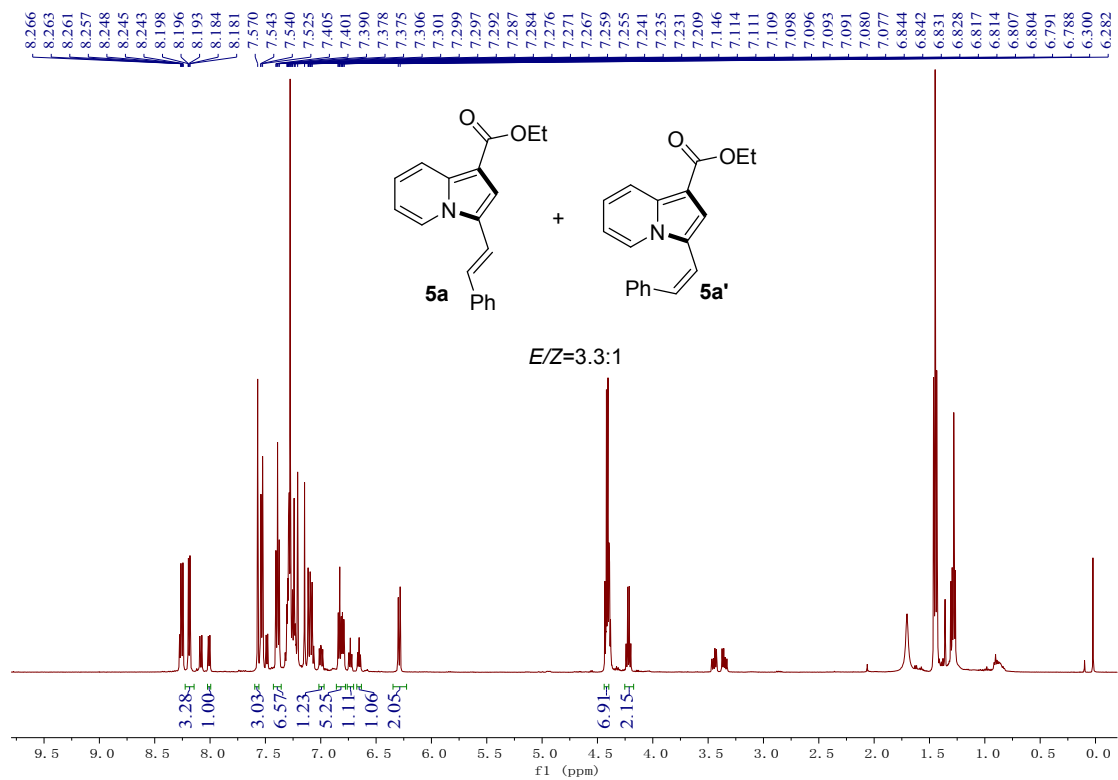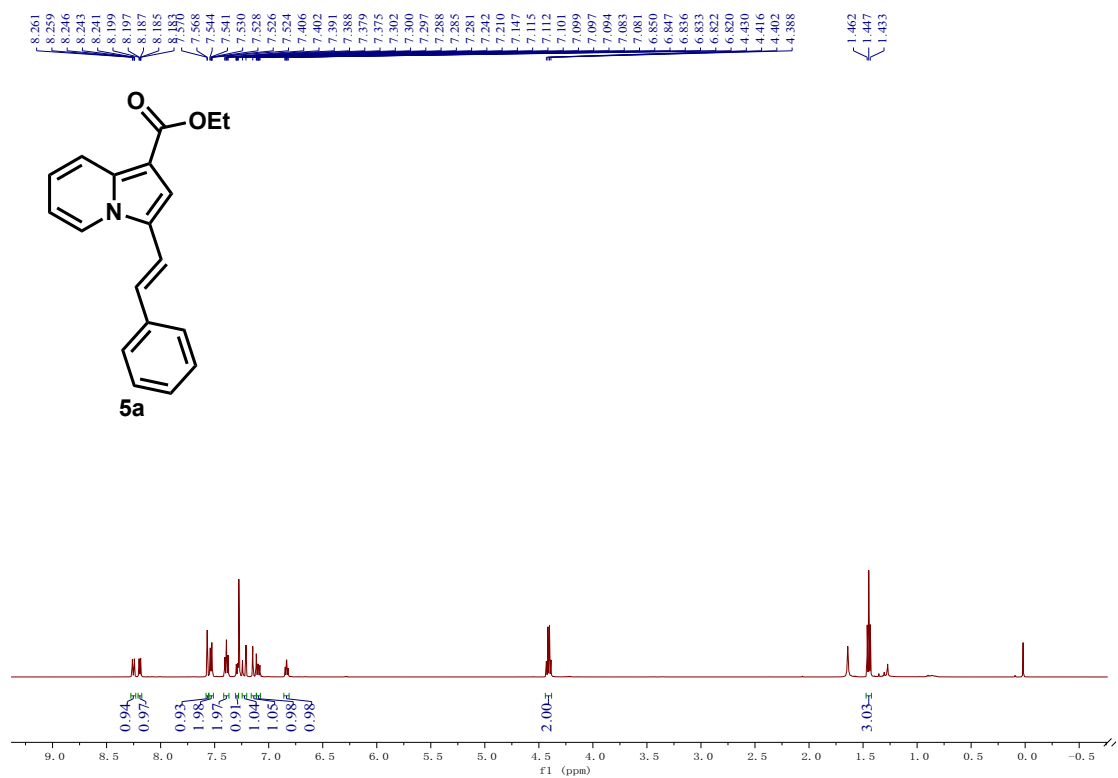

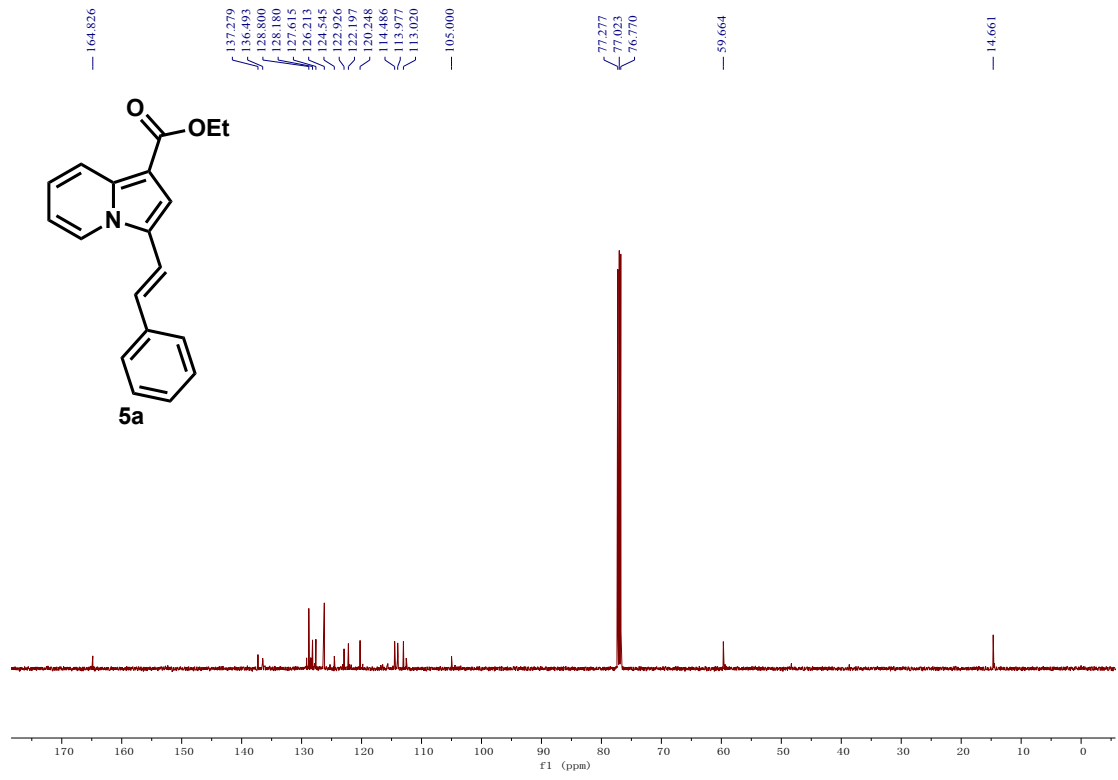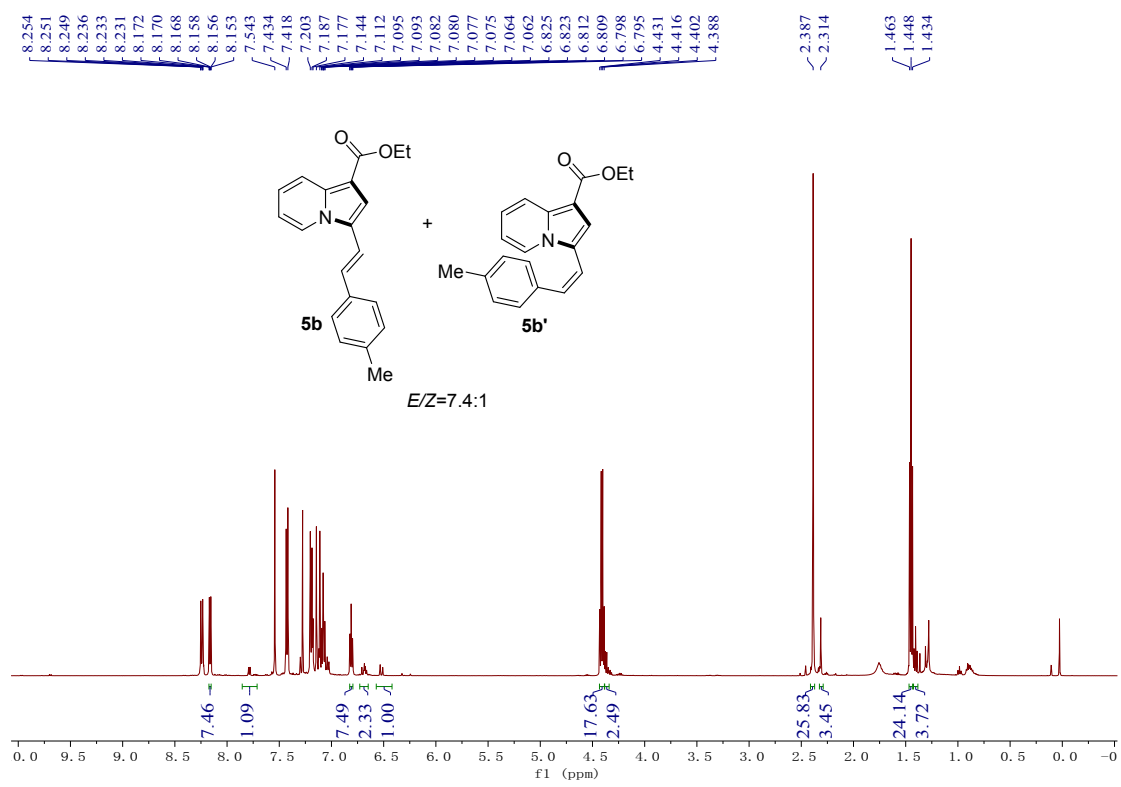

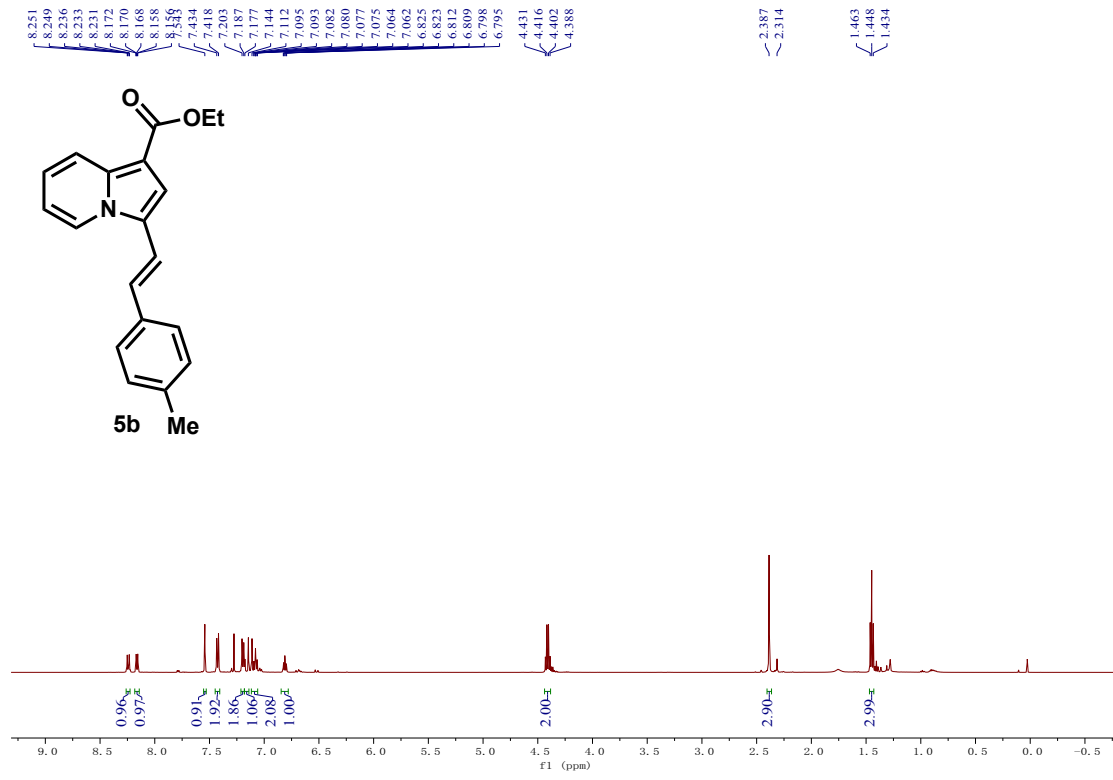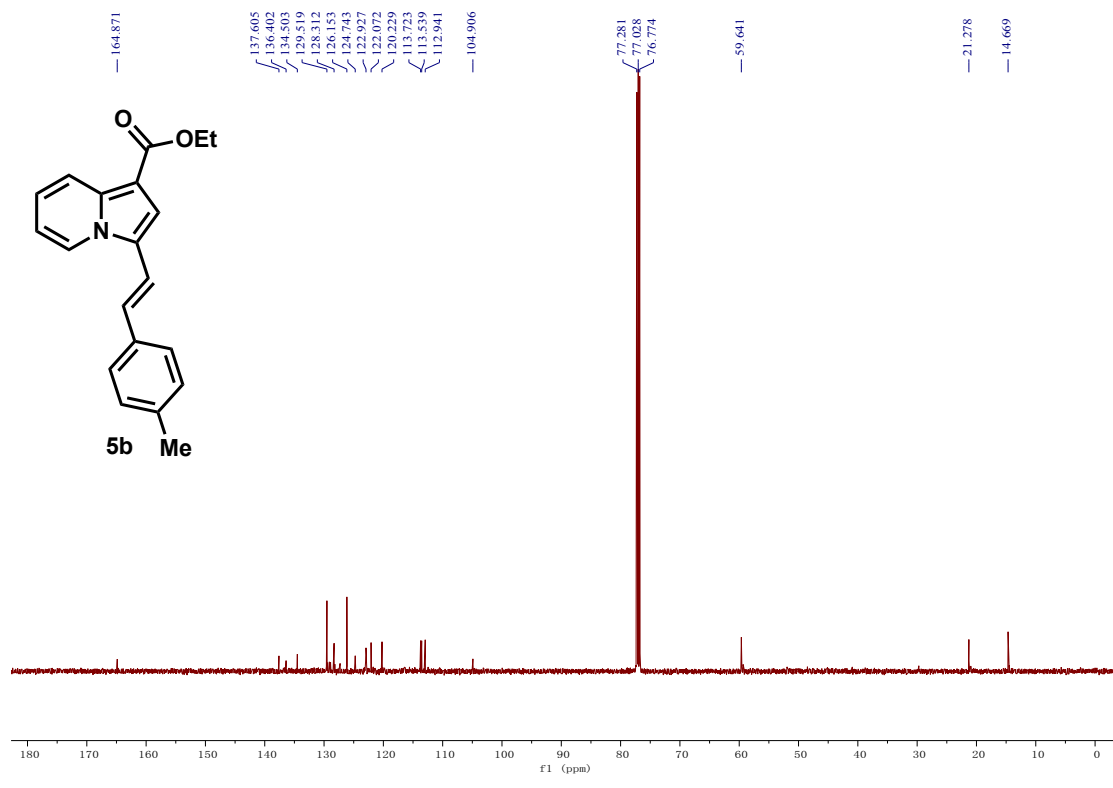

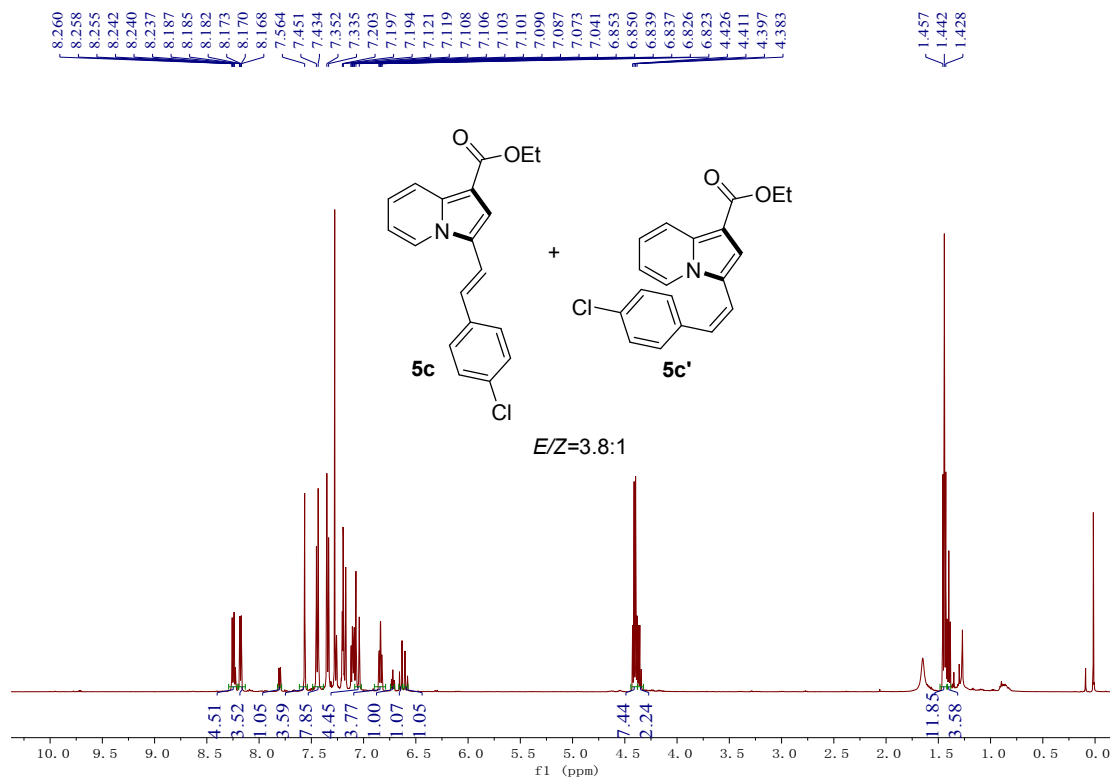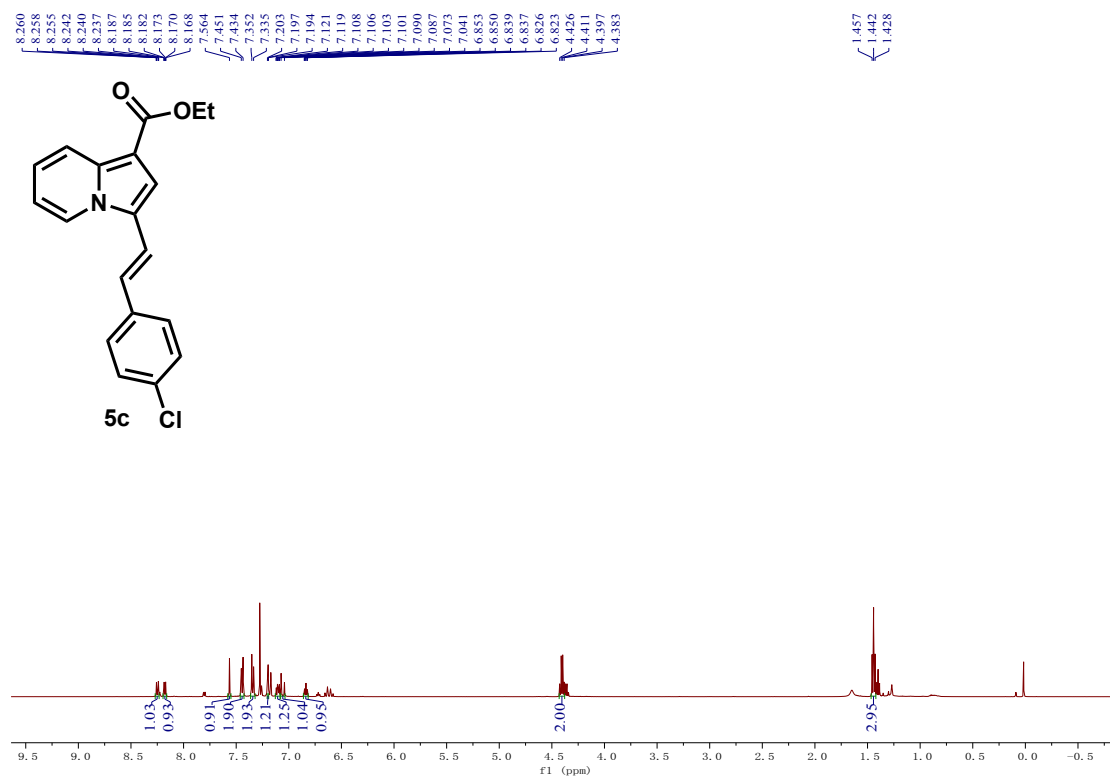

8.395  
8.393  
8.390  
8.381  
8.378  
8.376  
8.334  
8.308  
8.006  
7.968  
7.951  
7.910  
7.908  
7.899  
7.890  
7.889  
7.883  
7.878  
7.872  
7.870  
7.868  
7.653  
7.649  
7.636  
7.632  
7.560  
7.566  
7.566  
7.556  
7.554  
7.552  
7.546  
7.540  
7.537  
7.535  
7.526  
7.522  
7.522  
7.419  
7.128  
7.126  
7.115  
7.113  
7.110  
7.108  
7.097  
7.094  
6.745  
6.742  
6.731  
6.729  
6.718  
6.715  
3.960

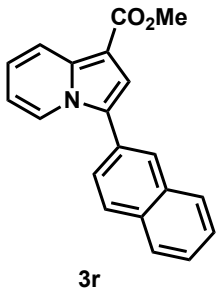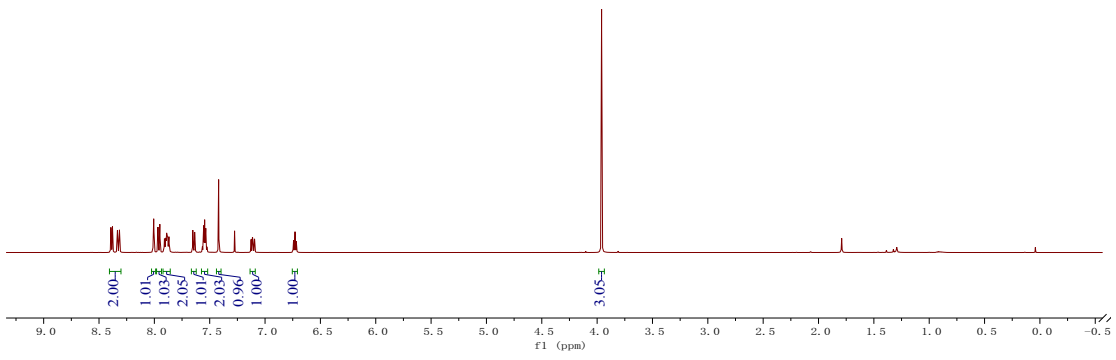

165.321  
136.535  
133.539  
132.766  
128.769  
128.506  
127.941  
127.762  
127.309  
126.636  
126.411  
123.338  
122.413  
120.142  
116.429  
112.730  
104.098  
77.283 CDCl<sub>3</sub>  
77.028 CDCl<sub>3</sub>  
76.774 CDCl<sub>3</sub>  
50.909

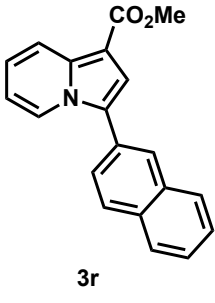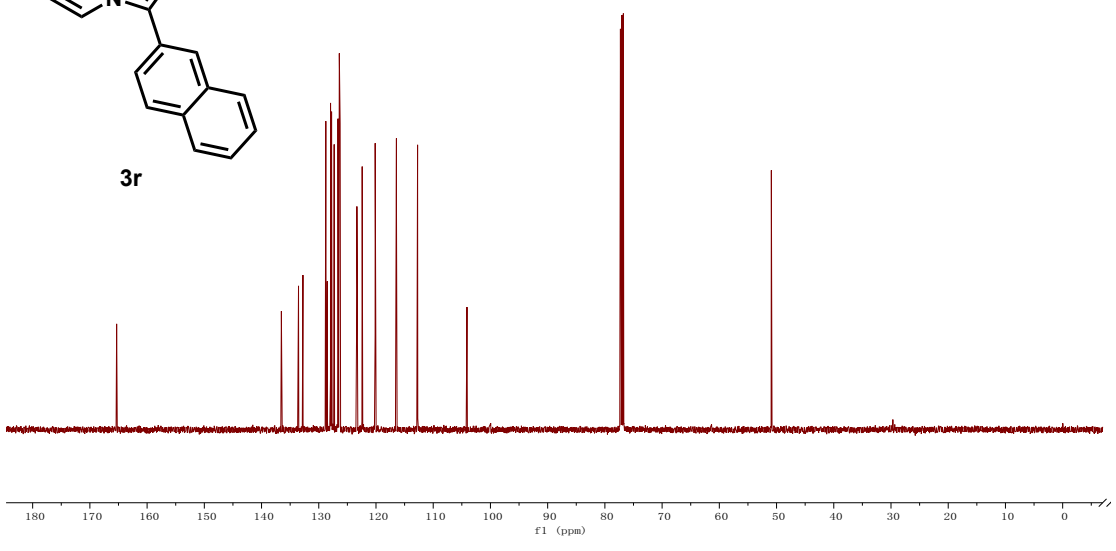

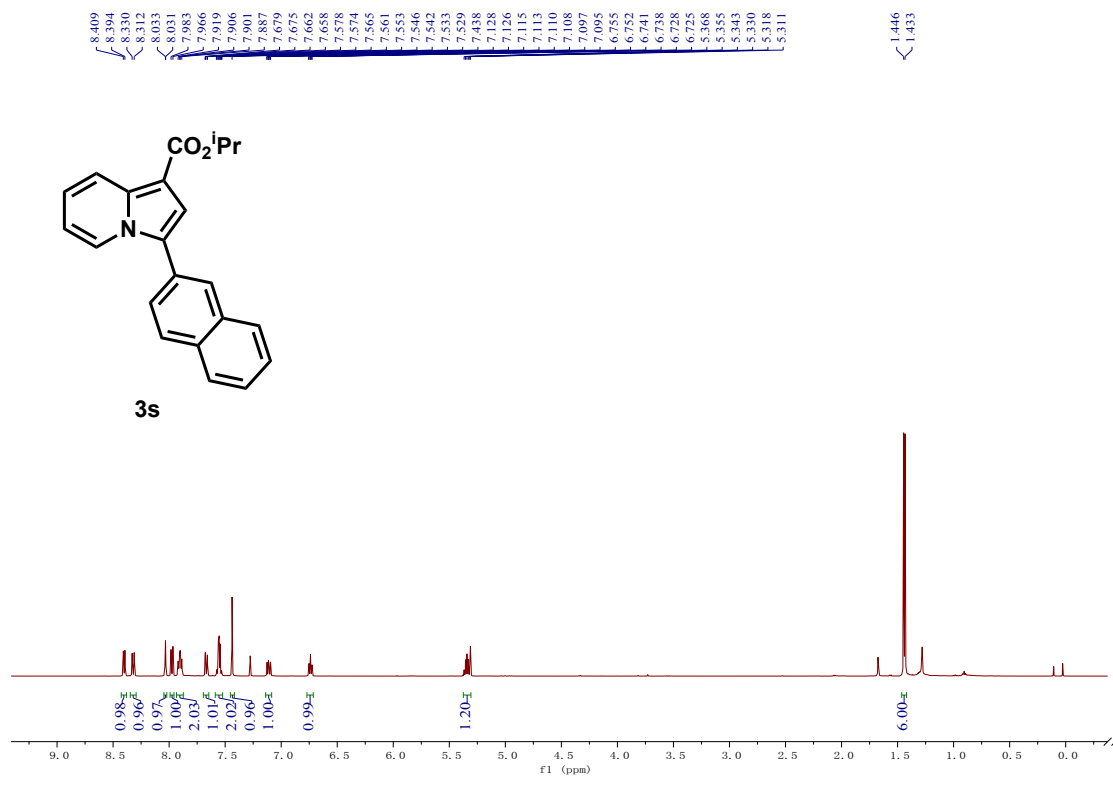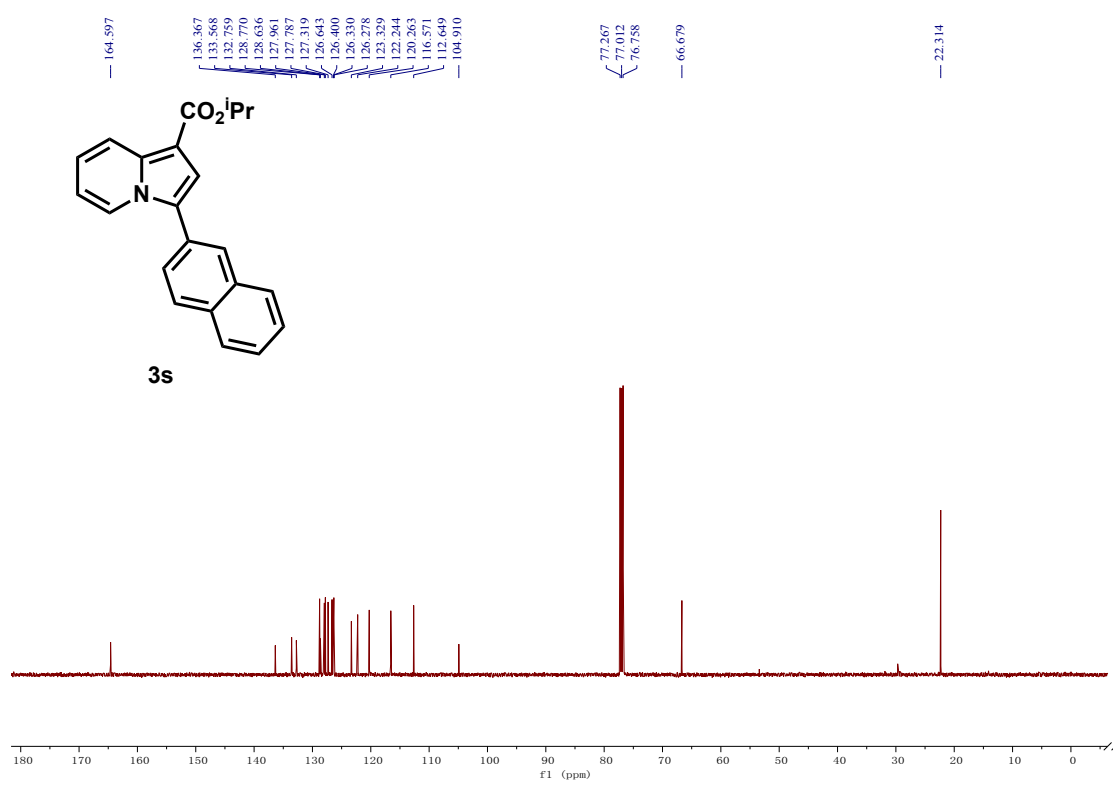

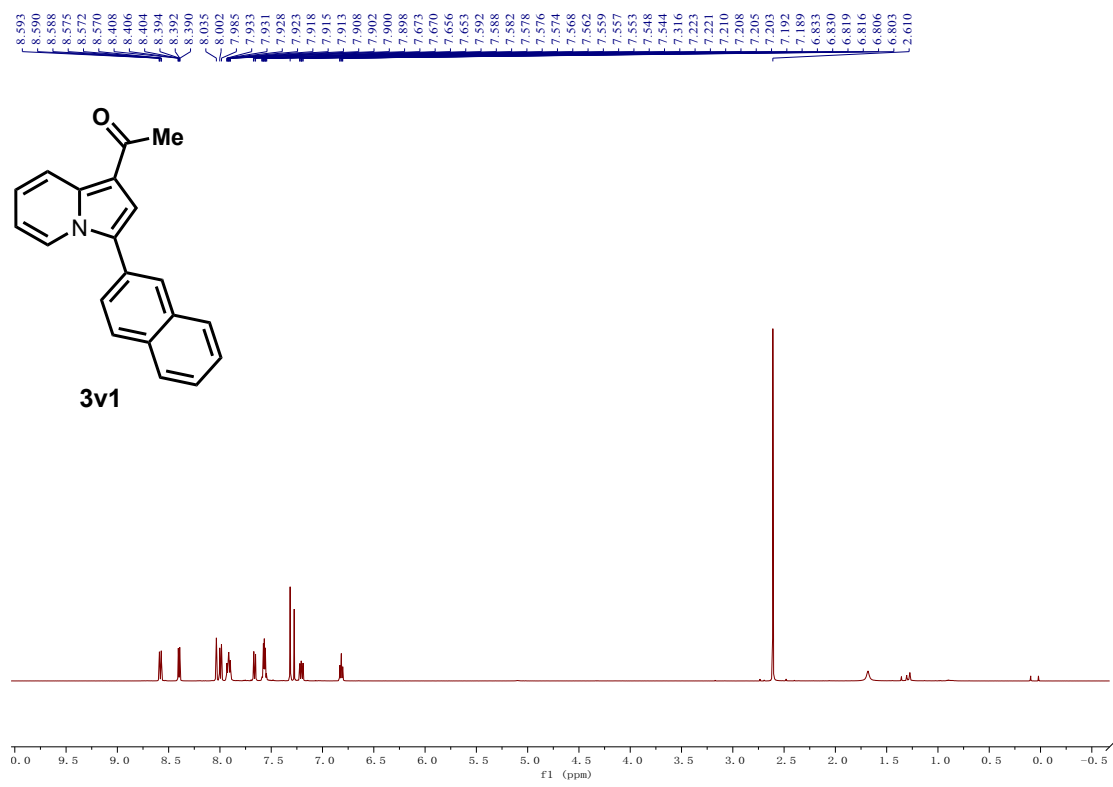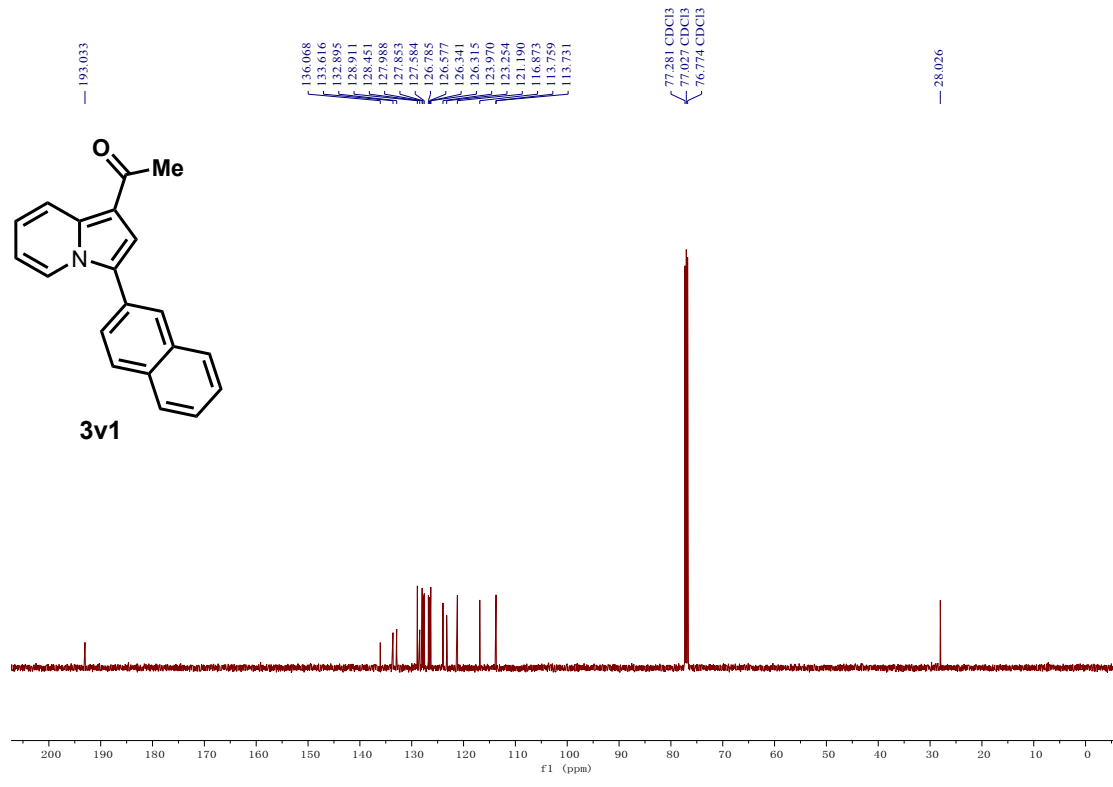

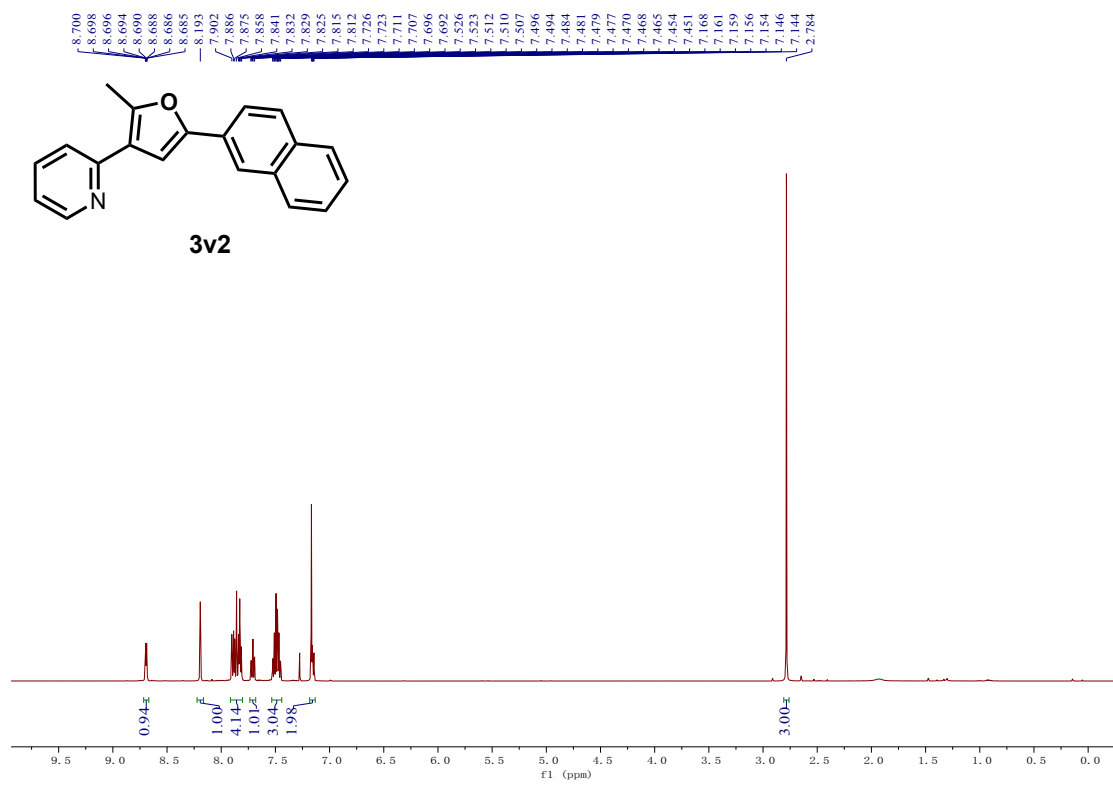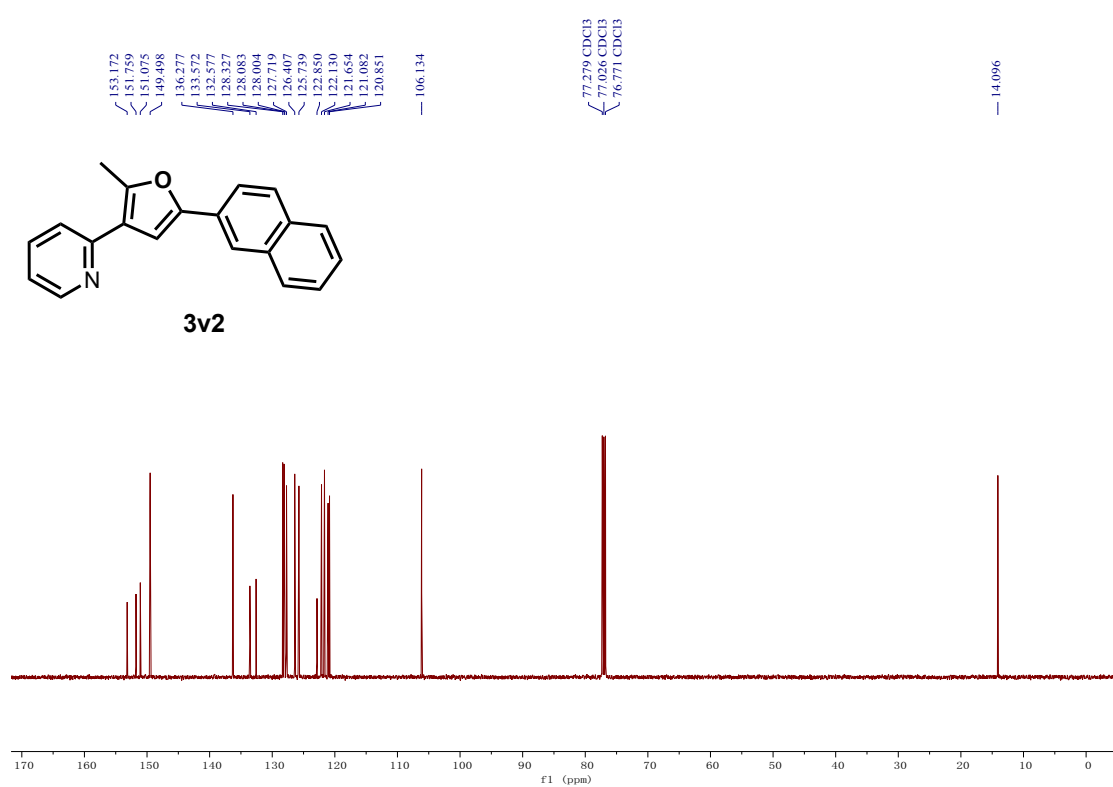



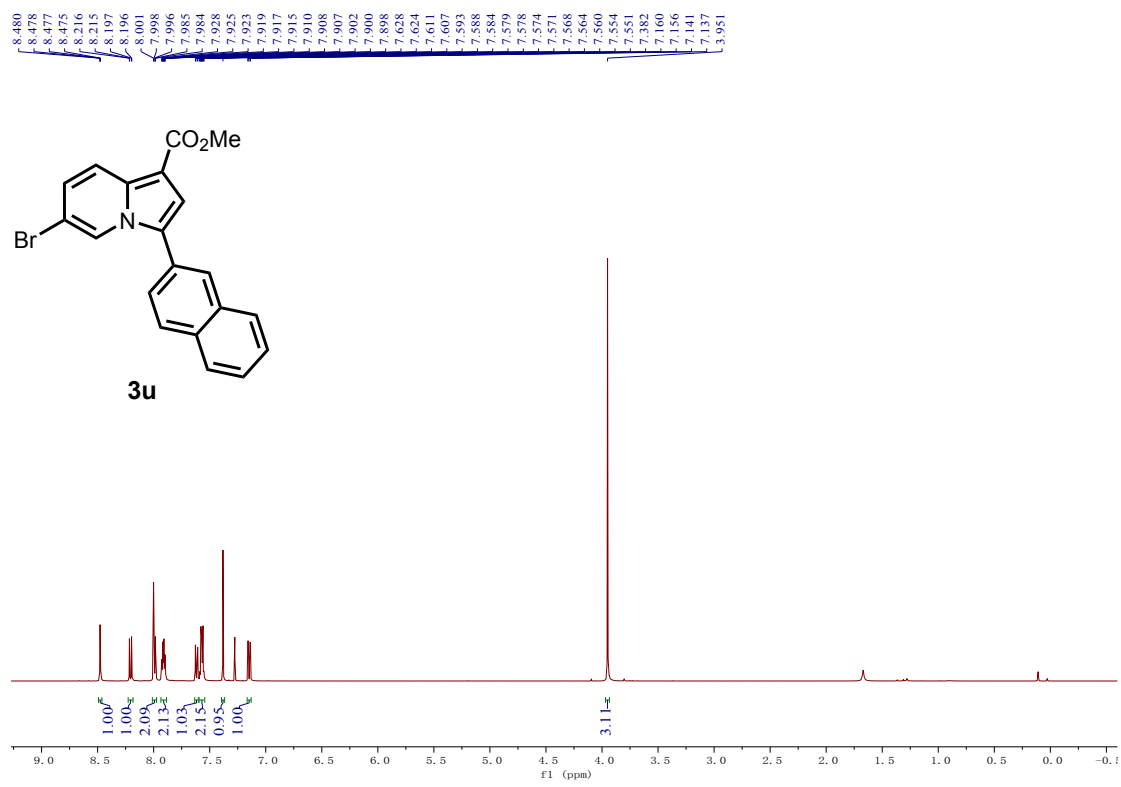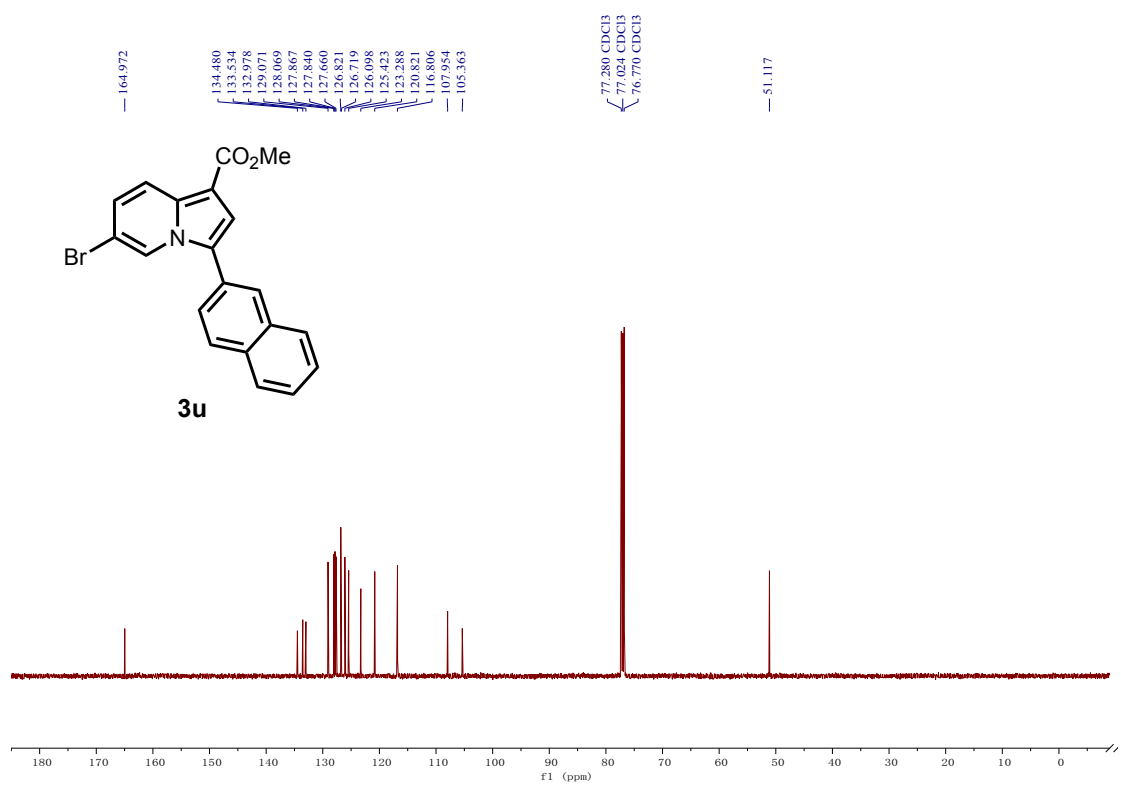

Supplement: d0qo00553c1.pdf [file d0qo00553c1.pdf]
